# **SARS-CoV-2 B.1.617.2 Delta variant emergence, replication and sensitivity to neutralising antibodies**

Petra Mlcochova<sup>1,2\*</sup>, Steven Kemp<sup>1,2,6\*</sup>, Mahesh Shanker Dhar<sup>3\*</sup>, Guido Papa<sup>4</sup>, Bo Meng<sup>1,2</sup>, Swapnil Mishra<sup>5</sup>, Charlie Whittaker<sup>5</sup>, Thomas Mellan<sup>5</sup>, Isabella Ferreira<sup>1,2</sup>, Rawlings Datir<sup>1,2</sup>, Dami A. Collier<sup>2,6</sup>, Anna Albecka<sup>4</sup>, Sujeet Singh<sup>3</sup>, Rajesh Pandey<sup>7</sup>, Jonathan Brown<sup>8</sup>, Jie Zhou<sup>8</sup>, Niluka Goonawardne<sup>8</sup>, Robin Marwal<sup>3</sup>, Meena Datta<sup>3</sup>, Shantanu Sengupta<sup>7</sup>, Kalaiarasan Ponnusamy<sup>3</sup>, Venkatraman Srinivasan Radhakrishnan<sup>3</sup>, Adam Abdullahi<sup>1,2</sup>, Oscar Charles<sup>6</sup>, Partha Chattopadhyay<sup>7</sup>, Priti Devi<sup>7</sup>, Daniela Caputo<sup>9</sup>, Tom Peacock<sup>8</sup>, Dr Chand Wattal<sup>10</sup>, Neeraj Goel<sup>10</sup>, Ambrish Satwik<sup>10</sup>, Raju Vaishya<sup>11</sup>, Meenakshi Agarwal<sup>12</sup>, The Indian SARS-CoV-2 Genomics Consortium (INSACOG), The CITIID-NIHR BioResource COVID-19 Collaboration, The Genotype to Phenotype Japan (G2P-Japan) Consortium, Antranik Mavousian<sup>13</sup>, Joo Hyeon Lee<sup>13,14</sup>, Jessica Bassi<sup>15</sup>, Chiara Silacci-Fegni<sup>15</sup>, Christian Saliba<sup>15</sup>, Dora Pinto<sup>15</sup>, Takashi Irie<sup>16</sup>, Isao Yoshida<sup>17</sup>, William L. Hamilton<sup>2</sup>, Kei Sato<sup>18,19</sup>, Leo James<sup>4</sup>, Davide Corti<sup>15</sup>, Luca Piccoli<sup>15</sup>, Samir Bhatt<sup>4,20</sup>, Seth Flaxman<sup>21</sup>, Wendy S. Barclay<sup>8</sup>, Partha Rakshit<sup>3\*</sup>, Anurag Agrawal<sup>7\*</sup>, Ravindra K. Gupta<sup>1,2, 22\*</sup>

<sup>1</sup> Cambridge Institute of Therapeutic Immunology & Infectious Disease (CITIID), Cambridge, UK.

<sup>2</sup> Department of Medicine, University of Cambridge, Cambridge, UK.

<sup>3</sup> National Centre for Disease Control, Delhi, India

<sup>4</sup> MRC – Laboratory of Molecular Biology, Cambridge, UK.

<sup>5</sup> Medical Research Council (MRC) Centre for Global Infectious Disease Analysis, Jameel Institute, School of Public Health, Imperial College London, UK.

<sup>6</sup> University College London, London, UK

<sup>7</sup> CSIR Institute of Genomics and Integrative Biology, Delhi, India

<sup>8</sup> Department of Infectious Diseases, Imperial College London, UK.

<sup>9</sup> NIHR Bioresource, Cambridge, UK

<sup>10</sup> Sri Ganga Ram Hospital, New Delhi, India

<sup>11</sup> Indraprastha Apollo Hospital, New Delhi

<sup>12</sup> Northern Railway Central Hospital, New Delhi, India

<sup>13</sup> Wellcome-MRC Cambridge Stem Cell Institute, Cambridge, UK.

<sup>14</sup> Department of Physiology, Development and Neuroscience, University of Cambridge, Cambridge, UK.

<sup>15</sup>Humabs Biomed SA, a subsidiary of Vir Biotechnology, 6500 Bellinzona, Switzerland

<sup>16</sup> Institute of Biomedical and Health Sciences, Hiroshima University, Hiroshima 7348551, Japan

<sup>17</sup> Tokyo Metropolitan Institute of Public Health, Tokyo 1690073, Japan

<sup>18</sup> Division of Systems Virology, The Institute of Medical Science, The University of Tokyo, Tokyo 1088639, Japan

<sup>19</sup> CREST, Japan Science and Technology Agency, Saitama 3220012, Japan

<sup>20</sup> Section of Epidemiology, Department of Public Health, University of Copenhagen, Denmark

<sup>21</sup> Department of Mathematics, Imperial College London, London, UK

<sup>22</sup>Africa Health Research Institute, Durban, South Africa.

\*Authors contributed equally to this work

Address for correspondence:

[rkg20@cam.ac.uk](mailto:rkg20@cam.ac.uk); [a.agrawal@igib.in](mailto:a.agrawal@igib.in); [partho\\_rakshit@yahoo.com](mailto:partho_rakshit@yahoo.com)

Key words: SARS-CoV-2; COVID-19; B.1.617; antibody escape; neutralising antibodies; infectivity; spike mutation; evasion; resistance; fitness; Delta variant

## Abstract

The SARS-CoV-2 B.1.617.2 (Delta) variant was first identified in the state of Maharashtra in late 2020 and spread throughout India, displacing the B.1.1.7 (Alpha) variant and other pre-existing lineages, including B.1.617.1 that was detected prior to B.1.617.2. Bayesian modelling indicates that the growth advantage of B.1.617.2 in Mumbai was most likely explained by increased transmissibility and immune evasion from previous infection. Indeed *in vitro*, we demonstrate that B.1.617.2 is approximately 6-fold less sensitive to neutralising antibodies in sera from recovered individuals, and approximately 8-fold less sensitive to vaccine-elicited antibodies as compared to wild type Wuhan-1 bearing D614G. B.1.617.2 spike pseudotyped viruses exhibited compromised sensitivity to monoclonal antibodies against the receptor binding domain (RBD) and N- terminal domain (NTD), in particular to the clinically approved bamvalinumb and imdevimab monoclonal antibodies. B.1.617.2 demonstrated higher replication efficiency in both airway organoid and human airway epithelial systems as compared to B.1.1.7, associated with B.1.617.2 spike being in a predominantly cleaved state compared to B.1.1.7. In an analysis of vaccinated healthcare workers across three centres in India during a period of mixed lineage circulation, we observed reduced ChAdOx-1 vaccine efficacy against B.1.617.2 relative to non- B.1.617.2. These combined epidemiological and *in vitro* data indicate that the dominance of B.1.617.2 in India has been most likely driven by a combination of evasion of neutralising antibodies in previously infected individuals and increased virus infectivity. B.1.617.2 threatens the efficacy of critically important therapeutic monoclonal antibodies for COVID-19 and compromised vaccine efficacy mandates continued infection control measures in the post-vaccination era.

## Introduction

India's first wave of SARS-CoV-2 infections in mid-2020 was relatively mild and was controlled by a nationwide lockdown. Since easing of restrictions, India has seen expansion in cases of COVID-19 since March 2021 with widespread fatalities and a death toll of over 400,000. The B.1.1.7 Alpha variant, introduced by travel from the United Kingdom (UK) in late 2020, expanded in the north of India and is known to be more transmissible than previous viruses bearing the D614G spike mutation, whilst maintaining sensitivity to vaccine elicited neutralising antibodies<sup>1,2</sup>. The B.1.617 variant was first identified in the state of Maharashtra in late 2020/early 2021<sup>3</sup>, spreading throughout India and to at least 90 countries. The first sub-lineage to be detected was B.1.617.1<sup>4-6</sup>, followed by B.1.617.2, both bearing the L452R spike receptor binding motif mutation also observed in B.1.427/B.1.429<sup>7</sup>. This mutation was previously reported to confer increased infectivity and a modest loss of susceptibility to neutralising antibodies<sup>8,9</sup>. B.1.617.2, termed the Delta variant by WHO, has since dominated over B.1.617.1 (Kappa variant) and other lineages including B.1.1.7 globally (<https://nextstrain.org/sars-cov-2>)<sup>10</sup>. B.1.617.2 bears spike mutations T19R, G142D, E156G, F157del, R158del, L452R, T478K, D614G, P681R and D950N relative to Wuhan-1 D614G.

Although vaccines have been available since early 2021, achieving near universal coverage has in adults has been an immense logistical challenge, in particular for populous nations where B.1.617.2 is growing rapidly with considerable morbidity and mortality<sup>11</sup>. Current vaccines were designed to target the B.1, Wuhan-1 virus, and the emergence of variants with reduced susceptibility to vaccines such as B.1.351 and P.1 has raised fears for longer term control and protection through vaccination<sup>12,13</sup>, particularly in risk groups<sup>14,15</sup>. The specific reasons behind the explosive global growth of B.1.617.2 in populations remain unclear. Possible explanations include increased infectivity as well as evasion of neutralising antibodies generated through vaccination or prior infection.

Here we analyse the growth and dominance of the B.1.617.2 Delta variant in Mumbai, with modelling analysis that implicates combined effects of immune evasion and increased transmissibility. We find significantly reduced sensitivity of B.1.617.2 to convalescent sera and sera from BNT162b and ChAdOx-1 vaccinees. Furthermore we find substantial loss of sensitivity to a large panel of spike specific monoclonal antibodies, including compromise of key monoclonals that are clinically approved - imdevimab and bamlanivumab. We show that B.1.617.2 exhibits higher replication over B.1.1.7 in two independent airway model systems



and that B.1.617.2 spike protein mediates more efficient cell entry and augmented syncytium formation, a process implicated in severe disease. Moreover, B.1.617.2 appears to confer an entry and replication advantage over B.1.617.1. In vaccinated health care workers (HCW) we find evidence for reduced ChAdOx-1 efficacy against B.1.617.2 relative to non- B.1.617.2. These data indicate that (i) significant immune evasion and virus fitness are both responsible for the observed global dominance of B.1.617.2, (ii) that health care settings should maintain infection control in settings where B.1.617.2 is prevalent and (iii) that REGN-COV2 combination therapy could be compromised by B.1.617.2, particularly in those with immune deficiency with concomitant risk of selection of escape mutants.

## Results

### B.1.617.2 growth advantage due to re-infection and increased transmissibility

We plotted the relative proportion of variants in new cases of SARS-CoV-2 in India since the start of 2021. Whilst B.1.617.1 emerged earlier, and co-circulated with B.1.1.7, it has since been replaced by B.1.617.2, which rapidly grew to predominate sequenced infections in India from March 2021 onwards (**Figure 1a**). We characterised B.1.617.2's epidemiological properties through dynamical modelling of the recent resurgence of SARS-CoV-2 transmission in Mumbai. We utilised a Bayesian model of SARS-CoV-2 transmission and mortality that simultaneously models two categories of virus ("B.1.617.2" and "non-B.1.617.2") and that allows for epidemiological properties (such as transmissibility and capacity to reinfect previously infected individuals) to vary between categories<sup>16</sup>. Full mathematical details and a simulation study are given in **Supplementary information** (and code is available on GitHub). This model explicitly incorporates waning of immune protection following infection, parameterised using the results of recent longitudinal cohort studies<sup>17,18</sup>. The model integrates epidemiological data on daily COVID-19 mortality ([api.covid19india.org](https://api.covid19india.org)), serological data from the city spanning July - December 2020<sup>18</sup> and genomic sequence data from GISAID (with lineage classification carried out using the Pangolin software tool (<https://pangolin.cog-uk.io/>)<sup>19</sup> (**Figure 1b,c**). Importantly, the model makes the assumption of a homogeneously mixed population and therefore ignores heterogeneities in contact patterns and degrees of exposures between different sub-groups such as healthcare or service workers where social distancing or working from home is not possible. Such heterogeneities would however likely concentrate new infections in those with a higher chance of having previously being infected,

and therefore from this perspective, our estimates of the degree of immune evasion are likely conservative.

Given the uncertainties in the date of B.1.617.2 introduction into Mumbai, and the degree of COVID-19 death under-ascertainment, we carried out a range of sensitivity analyses modelling different scenarios for both death underreporting and introduction dates, examining the epidemiological properties inferred for B.1.617.2 under each of these scenarios. Full results for the different scenarios are presented in **Extended Data Table 1**. Across each of these scenarios, our results support B.1.617.2 having altered epidemiological properties compared to SARS-CoV-2 lineages co-circulating in the city, and that the most plausible alteration to its epidemiological properties involves both an increase in transmissibility and some degree of immune-evasion. Results for the scenario assuming 50% death underreporting and an introduction date of 31st Jan 2021 (**Figure 1d**) indicate that B.1.617.2 is 1.1- to 1.4-fold (50% bCI) more transmissible (91% posterior probability that increase is  $> 1$ ) than co-circulating lineages in Mumbai (predominantly B.1.617.1 and B.1.1.7). These lineages have been estimated to be  $>1.5$  fold more transmissible than non-variant lineages<sup>1,20</sup>. Furthermore, the results indicate that B.1.617.2 is able to evade 16 to 55% of the immune protection provided by prior infection with non-B.1.617.2 lineages, with a 96% probability that immune evasion is  $> 5\%$ .<sup>1,20</sup>

Important caveats to our Bayesian modelling results include the use of serological data derived from a convenience sample of self-referring individuals presenting for testing, as well as significant uncertainties about the sampling frameworks underlying the SARS-CoV-2 genomic sequences available on GISAID. We also highlight that these results may not generalise to other settings. For example, our estimates of immune evasion are made in a setting in which a significant amount of immunity has been derived from previous infection, limiting their generalisability to settings in which vaccine-derived immunity predominates (given evidence suggesting differences in the immune responses elicited by vaccination compared to previous infection<sup>21</sup>).

# **B.1.617.2 shows reduced sensitivity to neutralising antibodies from recovered individuals**

We next sought biological support for the inferences from mathematical modelling, starting with immune evasion to antibody responses generated by previous SARS-CoV-2 infection. We used sera from twelve individuals infected during the first UK wave in mid-2020 (likely

following infection with SARS-CoV-2 Wuhan-1). These sera were tested for ability to neutralise a B.1.617.2 viral isolate (obtained from nose/throat swab), in comparison to a B.1.1.7 variant isolate, a wild type (WT) Wuhan-1 virus bearing D614G in spike, and B.1.351 (Beta) variant. The Delta variant contains several spike mutations that are located at positions within the structure that are predicted to alter its function (**Figure 1e**). We found that the B.1.1.7 virus isolate was 2.3-fold less sensitive to the sera, and that B.1.617.2 was 5.7-fold less sensitive to the sera compared to the WT. Importantly in the same assay, the B.1.351 (Beta) variant that emerged in South Africa demonstrated an 8.2-fold loss of neutralisation sensitivity relative to WT (**Figure 1f**).

### **B.1.617.2 shows reduced sensitivity to vaccine-elicited antibodies**

We used a B.1.617.2 live virus isolate to test susceptibility to vaccine elicited serum neutralising antibodies in individuals following vaccination with two doses ChAdOx-1 or BNT162b2. These experiments showed a loss of sensitivity for B.1.617.2 compared to wild type Wuhan-1 bearing D614G of around 8-fold for both sets of vaccine sera and reduction against B.1.1.7 that did not reach statistical significance (**Figure 2a**). We also used a pseudotyped virus (PV) system to test neutralisation potency of a larger panel of 65 vaccine-elicited sera (**Extended Data Table 2**), this time against PV bearing B.1.617.1 as well as B.1.617.2 spike compared to Wuhan-1 D614G spike (**Figure 2b**). Comparison of demographic data for each individual showed similar characteristics (**Extended Data Table 2**). The mean GMT against Delta Variant spike PV was lower for ChAdOx-1 compared to BNT162b2 (GMT 3372 versus 654,  $p < 0.0001$ , **Extended Data Table 2**).

### **B.1.617.2 is less sensitive to monoclonal antibodies (mAbs)**

We investigated the sensitivity of B.1.617.2 spike to neutralising antibodies by testing 33 (3 NTD, 21 RBM- and 9 non-RBM-specific) spike-specific mAbs isolated from 6 individuals that recovered from WT SARS-CoV-2 infection. We performed a neutralization assay using Vero E6 target cells expressing Transmembrane protease serine 2 (TMPRSS2) infected with PV bearing the Wuhan-1 D614G SARS-CoV-2 spike or the B.1.617.2 spike (**Figure 2c**, **Extended Data Figure 1a-c and Extended Data Table 3**). In addition, 5 clinical-stage receptor-binding motif (RBM)-mAbs (etesevimab, casirivimab, regdanvimab, imdevimab and bamlanivimab) were also tested (**Figure 2e**, **Extended Data Figure 1d and Extended Data Table 3**). We found that all three NTD-mAbs (100%) and four out of nine (44%) non-RBM mAbs completely lost neutralizing activity against B.1.617.2 (**Figure 2 d-e and Extended Data Figure 1a**).

Within the RBM-binding group, 16 out 25 mAbs (76%) showed a marked decrease (2-35 fold-change reduction) or complete loss (>40 fold-change reduction) of neutralizing activity to B.1.617.2, suggesting that in a sizeable fraction of RBM antibodies the L452R and T478K mutations are responsible for their loss of neutralizing activity (**Figures 2d-e, Extended Data Figure 1b**). Amongst the clinical-stage RBM-mAbs tested, bamlanivimab, which showed benefit in a clinical trial against prior variants<sup>22</sup>, did not neutralize B.1.617.2. Imdevimab, part of the REGN-COV2 therapeutic dual antibody cocktail<sup>23</sup>, as well as regdanvimab, displayed reduced neutralizing activity. The remaining clinical-stage mAbs, including S309 (the parental antibody from which sotrovimab was derived), retained potent neutralizing activity against B.1.617.2.

### **B.1.617.2 variant shows higher replication in human airway model systems**

We next sought biological evidence for the higher transmissibility predicted from the modelling. Increased replication could be responsible for generating greater numbers of virus particles, or the particles themselves could be more likely to lead to a productive infection. We first infected a lung epithelial cell line, Calu-3, comparing B.1.1.7 and B.1.617.2 (**Figure 3a-d**). We observed a replication advantage for B.1.617.2 as demonstrated by increase in intracellular RNA transcripts and Spike and Nucleocapsid proteins compared to B.1.1.7 (**Figure 3a-b**), as well as an increase in released virions from infected cells (**Figure 3c-d**). Next we tested B.1.1.7 against two separate isolates of B.1.617.2 in a human airway epithelial model<sup>24</sup>. In this system we again observed that both B.1.617.2 isolates had a significant replication advantage over B.1.1.7 (**Figure 3e-f**). Finally, we infected primary 3D airway organoids<sup>25</sup> (**Figure 3g**) with B.1.617.2 and B.1.1.7 virus isolates, noting a significant replication advantage for B.1.617.2 over B.1.1.7. These data clearly support higher replication rate and therefore transmissibility of B.1.617.2 over B.1.1.7.

In the aforementioned experiments (**Figure 3b**), we noted a higher proportion of intracellular B.1.617.2 spike in the cleaved state in comparison to B.1.1.7. In order to investigate this further we produced the two viruses as well as a Wuhan-1 WT D614G virus in Vero-hACE2-TMPRSS2 cells, harvested and purified virus from culture supernatants at 48 hours. This analysis showed that the B.1.617.2 spike was predominantly in the cleaved form, in contrast to WT and B.1.1.7 (**Extended Data Figure 3a-b**).

### **B.1.617.2 spike has enhanced entry efficiency associated with cleaved spike**

SARS-CoV-2 Spike is known to mediate cell entry via interaction with ACE2 and TMPRSS2<sup>26</sup> and is a major determinant of viral infectivity. In order to gain insight into the mechanism of increased infectivity of B.1.617.2, we tested single round viral entry of B.1.617.1 and B.1.617.2 spikes (**Extended Data Figure 2a-b**) using the pseudotyped virus (PV) system, infecting Calu-3 lung cells expressing endogenous levels of ACE2 (Angiotensin Converting Enzyme 2) and TMPRSS2 (Transmembrane protease serine 2) (**Figure 3j**), as well as other cells transduced or transiently transfected with ACE2 / TMPRSS2 (**Extended Data Figure 2b**). We first probed PV virions and cell lysates for spike protein and noted that the B.1.617 spikes were present predominantly in cleaved form in cells and virions, in contrast to WT (**Figure 3h-I, Extended Data Figure 2c**). We observed one log increased entry efficiency for both B.1.617.1 and B.1.617.2. over Wuhan-1 D614G wild type in nearly all cells tested (**Extended Data Figure 2b**). In addition, B.1.617.2 appeared to have an entry advantage compared to B.1.617.1 in some cells, and in particular Calu-3 bearing endogenous receptor levels (**Figure 3j**). Finally, we wished to confirm higher infectivity using live virus isolates of B.1.617.1 and B.1.617.2. As expected from the PV comparison, B.1.617.2 showed increased replication kinetics over B.1.617.1 in Calu-3 cells as measured by viral RNA in cells and TCID<sub>50</sub> of released virions (**Figure 3k**).

### **B.1.617.2 spike confers increased syncytium formation**

The plasma membrane route of entry, and indeed transmissibility in animal models, is critically dependent on the polybasic cleavage site (PBCS) between S1 and S2<sup>24,27,28</sup> and cleavage of spike prior to virion release from producer cells; this contrasts with the endosomal entry route, which does not require spike cleavage in producer cells.<sup>24,29,30</sup> Mutations at P681 in the PBCS have been observed in multiple SARS-CoV-2 lineages, most notably in the B.1.1.7 Alpha variant<sup>31</sup>. We previously showed that B.1.1.7 spike, bearing P681H, had significantly higher fusogenic potential than a D614G Wuhan-1 virus<sup>29</sup>. Here we tested B.1.617.1 and B.1.617.2 spike using a split GFP system to monitor cell-cell fusion (**Figure 4a, b, c**). We transfected spike bearing plasmids into Vero cells stably expressing the two different parts of Split-GFP, so that GFP signal could be measured over time upon cell-cell fusion (**Figure 4d**). The B.1.617.1 and B.1.617.2 spike proteins mediated higher fusion activity and syncytium formation than WT, but were similar to B.1.1.7 (**Figure 4d,e**). The single P681R mutation was able to recapitulated this phenotype (**Figure 4d,e**). We next tested the ability of furin inhibitor CMK<sup>32-34</sup> to inhibit cell-cell fusion, a process that requires cleaved spike. We found that fusion mediated by the B.1.617.2 spike was marginally less sensitive to CMK relative to Wuhan-1

WT D614G (Fold change 1.6 [95% CI 1.4-1.8,  $p < 0.05$ ], **Figure 4f**). Finally, we explored whether post vaccine sera could block syncytia formation, as this might be a mechanism for vaccine protection against pathogenesis. We titrated sera from ChAdOx-1 vaccinees and showed that indeed the cell-cell fusion could be inhibited in a manner that mirrored neutralisation activity of the sera against PV infection of cells (**Figure 4g**). Hence B.1.617.2 may induce cell-cell fusion in the respiratory tract and possibly higher pathogenicity even in vaccinated individuals with neutralising antibodies.

### **Breakthrough B.1.617.2 infections in ChAdOx-1 vaccinated health care workers**

Hitherto we have gathered epidemiological and biological evidence that the growth advantage of B.1.617.2 might relate to increased virus replication/transmissibility as well as re-infection due to evasion of neutralising antibodies from prior infection. We hypothesised that clinical vaccine efficacy against B.1.617.2 would be compromised relative to other circulating variants. Although overall national vaccination rates were low in India in the first quarter of 2021, vaccination of health care workers (HCW) started in early 2021 with the ChAdOx-1 vaccine (Covishield). During the wave of infections during March and April, an outbreak of symptomatic SARS-CoV-2 was confirmed in 30 vaccinated staff members amongst an overall workforce of 3800 at a single tertiary centre in Delhi by RT-PCR of nasopharyngeal swabs (age range 27-77 years). Genomic data from India suggested B.1.1.7 dominance overall (**Figure 1a**) and in the Delhi area during the first quarter of 2021 (**Figure 5a**), with growth of B.1.617 during March 2021. By April 2021, 385 out of 604 sequences reported to GISAID for Delhi were B.1.617.2. Short-read sequencing<sup>35</sup> of symptomatic individuals in the HCW outbreak revealed the majority were B.1.617.2 with a range of other B lineage viruses including B.1.1.7 and B.1.617.1 (**Figure 5b**). There were no cases that required ventilation though one HCW received oxygen therapy. Phylogenetic analysis demonstrated a group of highly related, and in some cases, genetically indistinct sequences that were sampled within one or two days of each other (**Figure 5b**). These data are consistent with a single transmission from an infected individual, constituting an over dispersion or ‘super spreader’ event. We next looked in greater detail at the vaccination history of cases. Nearly all had received two doses at least 21 days previously, and median time since second dose was 27 days (**Figure 5b, Supplementary information**).

We obtained similar data on breakthrough infections and ChAdOx-1 vaccination status in two other health facilities in Delhi with 1100 and 4000 HCW staff members respectively (**Figure**



**5c-d**). In hospital two there were 106 sequences from symptomatic infections. After filtering, we reconstructed phylogenies using 66 with high quality whole genome coverage >95%; in hospital three there were 65 symptomatic infections from which genomes were generated, with 52 high quality genomes used for inferring phylogenies after filtering (**Figure 5c-d**). As expected from variants circulating in the community, we observed that B.1.617.2 dominated vaccine-breakthrough infections in both centres (**Figure 5c-d, Extended Data Table 4a**). The magnitude of vaccine responses in a small sample of HCW with subsequent breakthrough was measured and appeared similar to responses in a control group of HCW that did not test positive for SARS-CoV-2 subsequently (**Extended Data Figure 3a**). Analysis of Ct values in positive samples did not show significant differences between HCW infected with B.1.617.2 versus non- B.1.617.2 (**Extended Data Figure 3b, Supplementary information**).

Finally, we evaluated the effect of B.1.617.2 on vaccine efficacy against symptomatic infection in the HCWs. Ideally one would use a randomised controlled trial for such an analysis, though a placebo arm is not ethical at present. In terms of observational studies, one would ideally have used a test negative case control approach. Given the lack of availability of test negative data in our HCW setting we used an alternative approach to estimate VE used by Public Health England (PHE)<sup>36</sup>. If the vaccine had equal efficacy against B.1.617.2 and non-B.1.617.2, a similar proportion of B.1.617.2 and non-B.1.617.2 breakthrough cases would be expected in both vaccinated and unvaccinated individuals. However, in our HCW, non-B.1.617.2 was isolated in a lower proportion of symptomatic cases in the fully vaccinated group compared to unvaccinated cases (**Extended Data Table 4b**). We used multivariable logistic regression to estimate the odds ratio of testing positive with B.1.617.2 versus non- B.1.617.2 in vaccinated relative to unvaccinated individuals, adjusting for age, sex and hospital. The adjusted odds ratio for B.1.617.2 relative to non-B.1.617.2 was 5.14 (95% CI 1.32-20.0, p=0.018) for two vaccine doses (**Extended Data Table 4b**). This indicates that vaccine efficacy against B.1.617.2 is reduced relative to non- B.1.617.2 viruses that included B.1.1.7, B.1 and B.1.617.1. These data are consistent with those derived in the UK where the non-B.1.617.2 infections were largely B.1.1.7<sup>36</sup>.

## Discussion

Here we have combined mathematical modelling, molecular epidemiology and *in vitro* experimentation to propose that increased replication fitness and reduced sensitivity of B.1.617.2 to neutralising antibodies from past infection contributed to the devastating epidemic

wave in India during the first quarter of 2021, where background infection to the Wuhan-1 WT D614G in 2020 was between 20-50%<sup>37</sup> and vaccination with at least one dose below 20%. The proposed contribution of both immune evasion and increased transmissibility would also explain the recent rapid replacement of B.1.1.7 by B.1.617.2 in the UK (<https://www.gisaid.org>), where vaccination rates are high in adults and infections not confined to the unvaccinated<sup>36</sup>.

We demonstrate evasion of neutralising antibodies by a B.1.617.2 live virus with sera from convalescent patients, as well as sera from individuals vaccinated with two different vaccines, one based on an adenovirus vector (ChAdOx-1), and the other mRNA based (BNT162b2). Our findings on reduced susceptibility of B.1.617.2 to vaccine elicited sera are similar to other reports<sup>38,39</sup>, including the lower GMT following two doses of ChAdOx-1 compared to BNT162b2<sup>38</sup>. Although we did not map the mutations responsible, previous work with shows that L452R and T478K in the spike RBD are likely to have contributed<sup>9</sup>, as well as spike NTD mutations such as T19R, R158G and the deletion at spike amino acid positions 156 and 157. The importance of NTD in both cell entry efficiency<sup>29,40</sup> as well as antibody evasion is increasingly recognised<sup>41,42</sup> and further work is needed to map specific determinants in the B.1.617.2 NTD.

We also report ChAdOx-1 vaccine breakthrough infections in health care workers at three Delhi hospitals, most of whom were fully vaccinated. These infections were predominantly B.1.617.2, with a mix of other lineages including B.1.1.7, reflecting prevalence in community infections. We estimated the relative vaccine efficacy of ChAdOx-1 vaccination in our HCW analysis against B.1.617.2 versus other lineages, finding an increased odds of infection with B.1.617.2 compared to non- B.1.617.2 following two doses. These data indicate reduced vaccine efficacy against B.1.617.2 and support an immune evasion advantage for B.1.617.2 and are in concordance with *in vitro* data from neutralizing assays. It is important to consider that increased infectivity at mucosal surfaces and cell-cell fusion and spread<sup>43</sup> may also facilitate ‘evasion’ from antibodies<sup>44</sup>. We showed that B.1.617.2 fused cells efficiently, and that blockade of this process by vaccine-elicited antibodies was compromised for B.1.617.2, potentially allowing it to spread locally in respiratory tissue at higher rate even in the context of vaccination.



Indeed, our work also shows that that B.1.617.2 had a fitness advantage compared to B.1.1.7 across physiologically relevant systems including HAE<sup>45</sup> and 3D airway organoids<sup>25</sup> where cell free and cell-cell infection are likely to be occurring together. These data support the notion of higher infectiousness of B.1.617.2, either due to higher viral burden or higher particle infectivity, resulting in higher probability of person to person transmission. Similarly, we were also able to report that B.1.617.2 has a replication advantage in lung cells compared to B.1.617.1, at least partially driven by spike. Given our data showing that B.1.617.2 and B.1.617.1 spikes confer similar sensitivities to sera from vaccinees, increased fitness is a parsimonious explanation for the growth advantage of B.1.617.2 over B.1.617.1.

Virus infectivity and fusogenicity mediated by the PBCS is a key determinant of pathogenicity and transmissibility<sup>24,46</sup> and there are indications that giant cells/syncytia formation are associated with fatal disease<sup>47</sup>. Spike cleavage and stability of cleaved spike are likely therefore to be critical parameters for future SARS-CoV-2 variants of concern. B.1.617.2 had similar kinetics of syncytia formation as compared to B.1.1.7, likely attributable to P681R. We show that vaccine-elicited sera can inhibit syncytia, and that this is compromised for B.1.617.2.

Compromise of bamlanivimab, but not imdevimab, was previously noted for B.1.617.1 and B.1.617.2<sup>48</sup>. The REGN-COV2 dual monoclonal antibody therapy containing casirivimab and imdevimab was shown to improve survival<sup>49</sup>, and our data showing reduced efficacy for imdevimab against B.1.617.2 might compromise clinical efficacy. Moreover, it could lead to possible selection of escape variants where there is immune compromise and chronic SARS-CoV-2 infection with B.1.617.2<sup>50</sup>. Further work to explore these possibilities is urgently needed.

Although weaker protection against infection with B.1.351 (Beta) (the variant with least sensitivity to neutralising antibodies) has been demonstrated for at least three vaccines<sup>12,51-53</sup>, progression to severe disease and death has been low. Therefore, at population scale, extensive vaccination will likely protect against moderate to severe disease due to B.1.617.2. Indeed, data from the UK already demonstrate low incidence of severe disease in vaccinees (PHE technical report 17). However, our data on ChAdOx-1 vaccine breakthrough and reduced vaccine efficacy against symptomatic B.1.617.2 infection are of concern given that hospitals frequently treat individuals who may have suboptimal immune responses to vaccination due to comorbidity. Such patients could be at risk for severe disease following infection from HCW

or other staff within hospital environments. Transmissions in vaccinated HCW could potentially involve overdispersion or ‘super-spreading’<sup>54</sup>, and indeed we document such an event in one of three hospitals studied. Therefore strategies to boost vaccine responses against variants are warranted in HCW and attention to infection control procedures should be continued even in the post vaccine era.

## Methods

### *Sequencing Quality Control and Phylogenetic Analysis*

Three sets of fasta consensus sequences were kindly provided by three separate Hospitals in Delhi, India. Initially, all sequences were concatenated into a multi-fasta, according to hospital, and then aligned to reference strain MN908947.3 (Wuhan-Hu-1) with mafft v4.475<sup>55</sup> using the --keeplength --addfragments options. Following this, all sequences were passed through Nextclade v0.15 (<https://clades.nextstrain.org/>) to determine the number of gap regions. This was noted and all sequences were assigned a lineage with Pangolin v3.1.5<sup>19</sup> and pangoLEARN (dated 15<sup>th</sup> June 2021). Sequences that could not be assigned a lineage were discarded. After assigning lineages, all sequences with more than 5% N-regions were also excluded.

Phylogenies were inferred using maximum-likelihood in IQTREE v2.1.4<sup>56</sup> using a GTR+R6 model with 1000 rapid bootstraps. The inferred phylogenies were annotated in R v4.1.0 using ggtree v3.0.2<sup>57</sup> and rooted on the SARS-CoV-2 reference sequence (MN908947.3). Nodes were arranged in descending order and lineages were annotated on the phylogeny as coloured tips, alongside a heatmap defining the number of ChAdOx-1 vaccines received from each patient.

### *Area plots and metadata*

Area plots were constructed in RStudio v4.1.0 using the ggplot2 package v3.3.3. Data to populate the plot was downloaded from the GISAID<sup>58</sup> (<http://gisaid.org>) database. Sequence metadata for the entire database was downloaded on 8<sup>th</sup> June 2021 and filtered by location

(United Kingdom, or Asia / India). The number of assigned lineages was counted for each location and the most prevalent 15 lineages were retained for plotting.

### *Structural Analyses*

The PyMOL Molecular Graphics System v.2.4.0 (<https://github.com/schrodinger/pymol-open-source/releases>) was used to map the location of the mutations defining the Delta lineage (B.1.617.2) onto closed-conformation spike protein - PDB: 6ZGE<sup>59</sup>.

### *Statistical Analyses*

Descriptive analyses of demographic and clinical data are presented as median and interquartile range (IQR) or mean and standard deviation (SD) when continuous and as frequency and proportion (%) when categorical. The difference in continuous and categorical data were tested using Wilcoxon rank sum or T-test and Chi-square test respectively. Linear regression was used to model the association between transmission chain size and lineage. The effect of clustering by hospital was taken into account in the regression analysis. All non-B.1.617.2 lineages were grouped into one category. The neutralisation by vaccine-elicited antibodies after the two doses of the BNT162b2 and Chad-Ox-1 vaccine was determined. The ID50 within groups were summarised as a geometric mean titre (GMT) and statistical comparison between groups were made with Mann-Whitney or Wilcoxon ranked sign test. Statistical analyses were done using Stata v13 and Prism v9.

### *Serum samples and ethical approval*

Ethical approval for use of serum samples. Controls with COVID-19 were enrolled to the NIHR BioResource Centre Cambridge under ethics review board (17/EE/0025).

### *Pseudotype virus experiments*

#### *Cells*

HEK 293T CRL-3216, Hela-ACE-2 (Gift from James Voss), Vero CCL-81 were maintained in Dulbecco's Modified Eagle Medium (DMEM) supplemented with 10% fetal calf serum (FCS), 100 U/ml penicillin, and 100mg/ml streptomycin. All cells were regularly tested and are mycoplasma free. H1299 cells were a kind gift from Sam Cook. Calu-3 cells were a kind gift from Paul Lehner, A549 A2T2<sup>60</sup> cells were a kind gift from Massimo Palmerini. Vero E6 Ace2/TMPRSS2 cells were a kind gift from Emma Thomson.

# *Pseudotype virus preparation for testing against vaccine elicited antibodies and cell entry*

Plasmids encoding the spike protein of SARS-CoV-2 D614 with a C terminal 19 amino acid deletion with D614G were used. Mutations were introduced using Quickchange Lightning Site-Directed Mutagenesis kit (Agilent) following the manufacturer's instructions. B.1.1.7 S expressing plasmid preparation was described previously, but in brief was generated by step wise mutagenesis. Viral vectors were prepared by transfection of 293T cells by using Fugene HD transfection reagent (Promega). 293T cells were transfected with a mixture of 11ul of Fugene HD, 1µg of pCDNAΔ19 spike-HA, 1ug of p8.91 HIV-1 gag-pol expression vector and 1.5µg of pCSFLW (expressing the firefly luciferase reporter gene with the HIV-1 packaging signal). Viral supernatant was collected at 48 and 72h after transfection, filtered through 0.45um filter and stored at -80°C as previously described. Infectivity was measured by luciferase detection in target 293T cells transfected with TMPRSS2 and ACE2.

## *Standardisation of virus input by SYBR Green-based product-enhanced PCR assay (SG-PERT)*

The reverse transcriptase activity of virus preparations was determined by qPCR using a SYBR Green-based product-enhanced PCR assay (SG-PERT) as previously described<sup>61</sup>. Briefly, 10-fold dilutions of virus supernatant were lysed in a 1:1 ratio in a 2x lysis solution (made up of 40% glycerol v/v 0.25% Triton X-100 v/v 100mM KCl, RNase inhibitor 0.8 U/ml, TrisHCL 100mM, buffered to pH7.4) for 10 minutes at room temperature.

12µl of each sample lysate was added to thirteen 13µl of a SYBR Green master mix (containing 0.5µM of MS2-RNA Fwd and Rev primers, 3.5pmol/ml of MS2-RNA, and 0.125U/µl of Ribolock RNase inhibitor and cycled in a QuantStudio. Relative amounts of reverse transcriptase activity were determined as the rate of transcription of bacteriophage MS2 RNA, with absolute RT activity calculated by comparing the relative amounts of RT to an RT standard of known activity.

## *Viral isolate comparison between B.1.617.1 and B.1.617.2*

### *Cell Culture*

VeroE6/TMPRSS2 cells [an African green monkey (*Chlorocebus sabaeus*) kidney cell line; JCRB1819]<sup>62</sup> were maintained in Dulbecco's modified Eagle's medium (low glucose) (Wako, Cat# 041-29775) containing 10% FCS, G418 (1 mg/ml; Nacalai Tesque, Cat# G8168-10ML) and 1% antibiotics (penicillin and streptomycin; PS).

Calu-3 cells (a human lung epithelial cell line; ATCC HTB-55) were maintained in Minimum essential medium Eagle (Sigma-Aldrich, Cat# M4655-500ML) containing 10% FCS and 1% PS.

#### *SARS-CoV-2 B.1.617.1 vs B.1.617.2 Preparation, Titration and infection of Calu-3*

Two viral isolates belonging to the B.1.617 lineage, B.1.617.1 (GISAID ID: EPI\_ISL\_2378733) and B.1.617.2 (GISAID ID: EPI\_ISL\_2378732) were isolated from SARS-CoV-2-positive individuals in Japan. Briefly, 100 µl of the nasopharyngeal swab obtained from SARS-CoV-2-positive individuals were inoculated into VeroE6/TMPRSS2 cells in the biosafety level 3 laboratory. After the incubation at 37°C for 15 minutes, a maintenance medium supplemented [Eagle's minimum essential medium (FUJIFILM Wako Pure Chemical Corporation, Cat# 056-08385) including 2% FCS and 1% PS] was added, and the cells were cultured at 37°C under 5% CO<sub>2</sub>. The cytopathic effect (CPE) was confirmed under an inverted microscope (Nikon), and the viral load of the culture supernatant in which CPE was observed was confirmed by real-time RT-PCR. To determine viral genome sequences, RNA was extracted from the culture supernatant using QIAamp viral RNA mini kit (Qiagen, Qiagen, Cat# 52906). cDNA library was prepared by using NEB Next Ultra RNA Library Prep Kit for Illumina (New England Biolab, Cat# E7530) and whole genome sequencing was performed by Miseq (Illumina).

To prepare the working virus, 100 µl of the seed virus was inoculated into VeroE6/TMPRSS2 cells (5,000,000 cells in a T-75 flask). At one hour after infection, the culture medium was replaced with Dulbecco's modified Eagle's medium (low glucose) (Wako, Cat# 041-29775) containing 2% FBS and 1% PS; at 2-3 days postinfection, the culture medium was harvested and centrifuged, and the supernatants were collected as the working virus.

The titer of the prepared working virus was measured as 50% tissue culture infectious dose (TCID<sub>50</sub>). Briefly, one day prior to infection, VeroE6/TMPRSS2 cells (10,000 cells/well) were seeded into a 96-well plate. Serially diluted virus stocks were inoculated to the cells and incubated at 37°C for 3 days. The cells were observed under microscopy to judge the CPE appearance. The value of TCID<sub>50</sub>/ml was calculated with the Reed-Muench method<sup>63</sup>.

One day prior to infection, 20, 000 Calu-3 cells were seeded into a 96-well plate. SARS-CoV-2 (200 TCID<sub>50</sub>) was inoculated and incubated at 37°C for 1 h. The infected cells were washed,

and 180 µl of culture medium was added. The culture supernatant (10 µl) was harvested at indicated time points and used for real-time RT-PCR to quantify the viral RNA copy number.

### *Real-Time RT-PCR*

Real-time RT-PCR was performed as previously described<sup>64,65</sup>. Briefly, 5 µl of culture supernatant was mixed with 5 µl of 2 × RNA lysis buffer [2% Triton X-100, 50 mM KCl, 100 mM Tris-HCl (pH 7.4), 40% glycerol, 0.8 U/µl recombinant RNase inhibitor (Takara, Cat# 2313B)] and incubated at room temperature for 10 min. RNase-free water (90 µl) was added, and the diluted sample (2.5 µl) was used as the template for real-time RT-PCR performed according to the manufacturer's protocol using the One Step TB Green PrimeScript PLUS RT-PCR kit (Takara, Cat# RR096A) and the following primers: Forward *N*, 5'-AGC CTC TTC TCG TTC CTC ATC AC-3'; and Reverse *N*, 5'-CCG CCA TTG CCA GCC ATT C-3'. The copy number of viral RNA was standardized with a SARS-CoV-2 direct detection RT-qPCR kit (Takara, Cat# RC300A). The fluorescent signal was acquired using a QuantStudio 3 Real-Time PCR system (Thermo Fisher Scientific), a CFX Connect Real-Time PCR Detection system (Bio-Rad) or a 7500 Real Time PCR System (Applied Biosystems).

### *Virus growth kinetics in HAE cells*

Primary nasal human airway epithelial (HAE) cells at air-liquid interface (ALI) were purchased from Epithelix and the basal MucilAir medium (Epithelix) was changed every 2-3 days for maintenance of HAE cells. All dilution of viruses, wash steps and harvests were carried out with OptiPRO SFM (Life Technologies) containing 2X GlutaMAX (Gibco). All wash and harvest steps were performed by addition of 200ul SFM to the apical surface and incubation for 10 mins at 37°C before removing SFM. To infect, basal medium was replaced, the apical surface of the HAE cells washed once with SFM to remove mucus before addition of virus to triplicate wells. Cells were infected at a multiplicity of 1e4 genomes copies of virus per cell based on E gene qRT-PCR. Inoculum was incubated for 1 h at 37°C before removing, washing the apical surface twice and the second wash taken as harvest for 0 hpi. A single apical wash was performed to harvest virus at 24, 48 and 71 hr timepoints. Isolates used were B.1.617.2 isolate #60 hCoV-19/England/SHEF-10E8F3B/2021 (EPI\_ISL\_1731019), B.1.617.2 isolate #285 hCoV-19/England/PHEC-3098A2/2021 (EPI\_ISL\_2741645) and B.1.1.7 isolate #7540 SMH2008017540 (confirmed B.1.1.7 in-house but not yet available on GISAID).



| Subtype   | Name  | Sequencing | 19 | 77 | 142 | 156-158 | 222 | 452 | 478 | 614 | 681 | 950 |
|-----------|-------|------------|----|----|-----|---------|-----|-----|-----|-----|-----|-----|
| Wuhan     | Wuhan | -          | T  | K  | G   | WT      | A   | L   | T   | D   | P   | D   |
| B.1.617.2 | 60    | VAT2       | R  | R  | D   | del     | V   | R   | K   | G   | R   | N   |
| B.1.617.2 | 285   | VAT2       | R  |    | D   | del     | V   | R   | K   | G   | R   | N   |

# *Titration of outputs from HAE infections*

For determining genome copies in the virus inputs and in the supernatant harvested from HAE cells, RNA was extracted using QIAasymphony DSP Virus/Pathogen Mini Kit on the QIAasymphony instrument (Qiagen). qRT-PCR was then performed using AgPath RT-PCR (Life Technologies) kit on a QuantStudio(TM) 7 Flex System with the primers for SARS-CoV-2 E gene used in Corman et al., (2020). A standard curve was also generated using dilutions viral RNA of known copy number to allow quantification of E gene copies in the samples from Ct values. E gene copies per ml of original virus supernatant were then calculated.

For measuring infectious virus in harvests from HAE cells, plaque assays were performed by performing serial log dilutions of supernatant in DMEM, 1% NEAA and 1% P/S and inoculating onto PBS-washed Vero cells, incubating for 1 hr at 37°C, removing inoculum and overlaying with 1× MEM, 0.2% w/v BSA, 0.16% w/v NaHCO<sub>3</sub>, 10 mM HEPES, 2mM L-Glutamine, 1× P/S, 0.6% w/v agarose. Plates were incubated for 3 d at 37 °C before overlay was removed and cells were stained for 1 h at room temperature in crystal violet solution.

# *Lung organoid infection by replication competent SARS-CoV-2 isolates.*

Airway epithelial organoids were prepared as previously reported.<sup>25</sup> For viral infection primary organoids were passaged and incubated with SARS-CoV-2 in suspension at a multiplicity of infection (MOI) of 1 for 2 hours. Subsequently, the infected organoids were washed twice with PBS to remove the viral particles. Washed organoids were plated in 20 µl Matrigel domes, cultured in organoid medium and harvested at different timepoints.

Cells were lysed 24 and 48h post-infection and total RNA isolated. cDNA was synthesized and qPCR was used to determine copies of nucleoprotein gene in samples. Standard curve was prepared using SARS-CoV-2 Positive Control plasmid containing full nucleocapsid protein (N gene) (NEB) and used to quantify copies of N gene in organoid samples. 18S ribosomal RNA was used as a housekeeping gene to normalize sample-to-sample variation.

# *Western blotting*

Cells were lysed and supernatants collected 18 hours post transfection. Purified virions were prepared by harvesting supernatants and passing through a 0.45 µm filter. Clarified supernatants were then loaded onto a thin layer of 8.4% optiprep density gradient medium (Sigma-Aldrich) and placed in a TLA55 rotor (Beckman Coulter) for ultracentrifugation for 2 hours at 20,000 rpm. The pellet was then resuspended for western blotting. Cells were lysed with cell lysis buffer (Cell signalling), treated with Benzonase Nuclease (70664 Millipore) and boiled for 5 min. Samples were then run on 4%–12% Bis Tris gels and transferred onto nitrocellulose or PVDF membranes using an iBlot or semidry (Life Technologies and Biorad, respectively).

Membranes were blocked for 1 hour in 5% non-fat milk in PBS + 0.1% Tween-20 (PBST) at room temperature with agitation, incubated in primary antibody (anti-SARS-CoV-2 Spike, which detects the S2 subunit of SARS-CoV-2 S (Invitrogen, PA1-41165), anti-GAPDH (proteintech) or anti-p24 (NIBSC)) diluted in 5% non-fat milk in PBST for 2 hours at 4°C with agitation, washed four times in PBST for 5 minutes at room temperature with agitation and incubated in secondary antibodies anti-rabbit HRP (1:10000, Invitrogen 31462), anti-bactin HRP (1:5000; sc-47778) diluted in 5% non-fat milk in PBST for 1 hour with agitation at room temperature. Membranes were washed four times in PBST for 5 minutes at room temperature and imaged directly using a ChemiDoc MP imaging system (Bio-Rad).

# *Virus infection for virion western blotting*

Vero-hACE2-TMPRSS2 cells were infected with MOI of 1 and incubated for 48 hours. Supernatant was cleared by 5 min spin at 300xg and then precipitated with 10% PEG6000 (4h at RT). Pellets were resuspended directly in Laemmli buffer with 1mM DTT, then treated with Benzonase Nuclease(70664 Millipore) and sonicated prior loading for gel electrophoresis

# *Serum pseudotype neutralisation assay*

Spike pseudotype assays have been shown to have similar characteristics as neutralisation testing using fully infectious wild type SARS-CoV-2<sup>66</sup>. Virus neutralisation assays were performed on 293T cell transiently transfected with ACE2 and TMPRSS2 using SARS-CoV-2 spike pseudotyped virus expressing luciferase<sup>67</sup>. Pseudotyped virus was incubated with serial



dilution of heat inactivated human serum samples or convalescent plasma in duplicate for 1h at 37°C. Virus and cell only controls were also included. Then, freshly trypsinized 293T ACE2/TMPRSS2 expressing cells were added to each well. Following 48h incubation in a 5% CO<sub>2</sub> environment at 37°C, the luminescence was measured using Steady-Glo Luciferase assay system (Promega).

#### *Neutralization Assays for convalescent plasma*

Convalescent sera from healthcare workers at St. Mary's Hospital at least 21 days since PCR-confirmed SARS-CoV-2 infection were collected in May 2020 as part of the REACT2 study with ethical approval from South Central Berkshire B Research Ethics Committee (REC ref: 20/SC/0206; IRAS 283805).

Convalescent human serum samples were inactivated at 56°C for 30 min and replicate serial 2-fold dilutions (n=12) were mixed with an equal volume of SARs-CoV-2 (100 TCID<sub>50</sub>; total volume 100 µL) at 37°C for 1 h. Vero-hACE2 TMPRSS2 cells were subsequently infected with serial-fold dilutions of each sample for 3 days at 37°C. Virus neutralisation was quantified via crystal violet staining and scoring for cytopathic effect (CPE). Each-run included 1/5 dilutions of each test sample in the absence of virus to ensure virus-induced CPE in each titration. Back-titrations of SARs-CoV-2 infectivity were performed to demonstrate infection with ~100 TCID<sub>50</sub> in each well.

#### *Vaccinee Serum neutralization, live virus assays*

Vero-Ace2-TMPRSS2 cells were seeded at a cell density of 2x10<sup>4</sup>/well in 96w plate 24h before infection. Serum was titrated starting at a final 1:10 dilution with WT (SARS-CoV-2/human/Liverpool/REMRQ0001/2020), B.1.1.7 or B.1.617.2 virus isolates being added at MOI 0.01. The mixture was incubated 1h prior adding to cells. The plates were fixed with 8% PFA 72h post-infection and stained with Coomassie blue for 20 minutes. The plates were washed in water and dried for 2h. 1% SDS was added to wells and staining intensity was measured using FLUOstar Omega (BMG Labtech). Percentage cell survival was determined by comparing intensity of staining to an uninfected wells. A non-linear sigmoidal 4PL model (Graphpad Prism 9.1.2) was used to determine the ID<sub>50</sub> for each serum.

# *VSV pseudovirus generation for monoclonal antibody assays*

Replication defective VSV pseudovirus expressing SARS-CoV-2 spike proteins corresponding to the different VOC were generated as previously described with some modifications<sup>68</sup>. Lenti-X 293T cells (Takara, 632180) were seeded in 10-cm<sup>2</sup> dishes at a density of 5e6 cells per dish and the following day transfected with 10 µg of WT or B.1.617.2 spike expression plasmid with TransIT-Lenti (Mirus, 6600) according to the manufacturer's instructions. One day post-transfection, cells were infected with VSV-luc (VSV-G) with an MOI of 3 for 1 h, rinsed three times with PBS containing Ca<sup>2+</sup>/Mg<sup>2+</sup>, then incubated for an additional 24 h in complete media at 37°C. The cell supernatant was clarified by centrifugation, filtered (0.45 µm), aliquoted, and frozen at -80°C.

# *Pseudotyped virus neutralization assay for mAb*

Vero E6 expressing TMPRSS2 or not were grown in DMEM supplemented with 10% FBS and seeded into white 96 well plates (PerkinElmer, 6005688) at a density of 20 thousand cells per well. The next day, mAbs were serially diluted in pre-warmed complete media, mixed with WT or B.1.617.2 pseudoviruses and incubated for 1 h at 37°C in round bottom polypropylene plates. Media from cells was aspirated and 50 µl of virus-mAb complexes were added to cells and then incubated for 1 h at 37°C. An additional 100 µL of pre-warmed complete media was then added on top of complexes and cells incubated for an additional 16-24 h. Conditions were tested in duplicate wells on each plate and at least six wells per plate contained untreated infected cells (defining the 0% of neutralization, "MAX RLU" value) and infected cells in the presence of S2E12 and S2X259 at 25 µg/ml each (defining the 100% of neutralization, "MIN RLU" value). Virus-mAb -containing media was then aspirated from cells and 50 µL of a 1:2 dilution of SteadyLite Plus (Perkin Elmer, 6066759) in PBS with Ca<sup>++</sup> and Mg<sup>++</sup> was added to cells. Plates were incubated for 15 min at room temperature and then were analysed on the Synergy-H1 (Biotek). Average of Relative light units (RLUs) of untreated infected wells (MAX RLU<sub>ave</sub>) was subtracted by the average of MIN RLU (MIN RLU<sub>ave</sub>) and used to normalize percentage of neutralization of individual RLU values of experimental data according to the following formula:  $(1 - (RLU_x - MIN RLU_{ave}) / (MAX RLU_{ave} - MIN RLU_{ave})) \times 100$ . Data were analyzed and visualized with Prism (Version 9.1.0). IC50 values were calculated from the interpolated value from the log(inhibitor) versus response, using variable slope (four parameters) nonlinear regression with an upper constraint of ≤100, and a lower constrain equal to 0. Each neutralization assay was conducted on two independent experiments, i.e., biological replicates, where each biological replicate contains a technical duplicate. IC50

values across biological replicates are presented as arithmetic mean  $\pm$  standard deviation. The loss or gain of neutralization potency across spike variants was calculated by dividing the variant IC<sub>50</sub> by the WT IC<sub>50</sub> within each biological replicate, and then visualized as arithmetic mean  $\pm$  standard deviation.

#### *Plasmids for split GFP system to measure cell-cell fusion*

pQCXIP-BSR-GFP11 and pQCXIP-GFP1-10 were from Yutaka Hata <sup>69</sup> Addgene plasmid #68716; <http://n2t.net/addgene:68716>; RRID:Addgene\_68716 and Addgene plasmid #68715; <http://n2t.net/addgene:68715>; RRID:Addgene\_68715)

#### *Generation of GFP1-10 or GFP11 lentiviral particles*

Lentiviral particles were generated by co-transfection of Vero cells with pQCXIP-BSR-GFP11 or pQCXIP-GFP1-10 as previously described <sup>70</sup>. Supernatant containing virus particles was harvested after 48 and 72 hours, 0.45  $\mu$ m filtered, and used to infect 293T or Vero cells to generate stable cell lines. 293T and Vero cells were transduced to stably express GFP1-10 or GFP11 respectively and were selected with 2  $\mu$ g/ml puromycin.

#### *Cell-cell fusion assay*

Cell-cell fusion assay was carried out as previously described <sup>70,71</sup> but using a Split-GFP system. Briefly, Vero GFP1-10 and Vero-GFP11 cells were seeded at 80% confluence in a 1:1 ration in 24 multiwell plate the day before. Cells were co-transfected with 0.5  $\mu$ g of spike expression plasmids in pCDNA3 using Fugene 6 and following the manufacturer's instructions (Promega). Cell-cell fusion was measured using an Incucyte and determined as the proportion of green area to total phase area. Data were then analysed using Incucyte software analysis. Graphs were generated using Prism 8 software. Furin inhibitor CMK (Calbiochem) was added at transfection.

#### **Data availability**

All fasta consensus sequences files used in this analysis are available from <https://gisaid.org> or from [https://github.com/Steven-Kemp/hospital\\_india/tree/main/consensus\\_fasta](https://github.com/Steven-Kemp/hospital_india/tree/main/consensus_fasta).  
[Code for the Bayesian modelling analysis is available at:](#)  
[https://github.com/ImperialCollegeLondon/delta\\_modelling](https://github.com/ImperialCollegeLondon/delta_modelling)

#### **Author contributions**

Conceived study: AA, PR, SAK, DC, SB, SF, SM, RKG, DAC, LP, JB, DP, DC. Designed study and experiments: BM, PM, RKG, JB, NG, LCJ, GP, KS, IATM. Performed experiments: BM, PM, DAC, RD, IATMF, CS-F, CS, JB, LCG, JB, JZ, NG, GBM. Interpreted data: RKG, SAK, AA, SS, JB, RP, PC, PD, KP, VSR, SS, DC, TP, OC, KS, GP, LCJ, WB, SF, SB, DAC, BM, PM, RD, IATMF, PR, JB, KGCS, SM, CW, TM, SB, LP, DC, CS, CS-F and S.F.

## Acknowledgments

We would like to thank the Department of Biotechnology, NCDC, RKG is supported by a Wellcome Trust Senior Fellowship in Clinical Science (WT108082AIA). COG-UK is supported by funding from the Medical Research Council (MRC) part of UK Research & Innovation (UKRI), the National Institute of Health Research (NIHR) and Genome Research Limited, operating as the Wellcome Sanger Institute. This study was supported by the Cambridge NIHR Biomedical Research Centre. We would like to thank Thushan de Silva for the Delta isolate and Kimia Kimelian. SAK is supported by the Bill and Melinda Gates Foundation via PANGEA grant: OPP1175094. I.A.T.M.F. is funded by a SANTHE award (DEL-15-006). We would like to thank Paul Lehner for Calu-3 cells. We would like to thank Clare Lloyd and Sejal Saglani for providing the primary airway epithelial cultures, and James Voss for HeLa ACE2. We thank the Geno2pheno UK consortium. The authors acknowledge support from the G2P-UK National Virology consortium funded by MRC/UKRI (grant ref: MR/W005611/1). This study was also supported by The Rosetrees Trust and the Geno2pheno UK consortium. SF acknowledges the EPSRC (EP/V002910/1). KS is supported by AMED Research Program on Emerging and Re-emerging Infectious Diseases (20fk0108270 and 20fk0108413), JST SICORP (JPMJSC20U1 and JPMJSC21U5) and JST CREST (JPMJCR20H4).

## Competing Interests

J.B., C.S.-F., C.S., D.P., D.C. and L.P. are employees of Vir Biotechnology and may hold shares in Vir Biotechnology. RKG has received consulting fees from Johnson and Johnson and GSK.

## References

- 1 Volz, E. *et al.* Assessing transmissibility of SARS-CoV-2 lineage B.1.1.7 in England. *Nature*, doi:10.1038/s41586-021-03470-x (2021).
- 2 Collier, D. A. *et al.* SARS-CoV-2 B.1.1.7 sensitivity to mRNA vaccine-elicited, convalescent and monoclonal antibodies. *Nature* **593**, 136-141, doi:10.1101/2021.01.19.21249840 (2021).

804 3 Cherian, S. *et al.* Convergent evolution of SARS-CoV-2 spike mutations, L452R, E484Q and  
805 P681R, in the second wave of COVID-19 in Maharashtra, India. *bioRxiv*,  
806 2021.2004.2022.440932, doi:10.1101/2021.04.22.440932 (2021).

807 4 Hoffmann, M. *et al.* SARS-CoV-2 variant B.1.617 is resistant to Bamlanivimab and evades  
808 antibodies induced by infection and vaccination. *bioRxiv*, 2021.2005.2004.442663,  
809 doi:10.1101/2021.05.04.442663 (2021).

810 5 Ferreira, I. *et al.* SARS-CoV-2 B.1.617 emergence and sensitivity to vaccine-elicited  
811 antibodies. *bioRxiv*, 2021.2005.2008.443253, doi:10.1101/2021.05.08.443253 (2021).

812 6 Yadav, P. D. *et al.* Neutralization of variant under investigation B.1.617 with sera of BBV152  
813 vaccinees. *bioRxiv*, 2021.2004.2023.441101, doi:10.1101/2021.04.23.441101 (2021).

814 7 Deng, X. *et al.* Transmission, infectivity, and antibody neutralization of an emerging SARS-  
815 CoV-2 variant in California carrying a L452R spike protein mutation. *medRxiv*,  
816 doi:10.1101/2021.03.07.21252647 (2021).

817 8 McCallum, M. *et al.* SARS-CoV-2 immune evasion by variant B.1.427/B.1.429. *bioRxiv*,  
818 2021.2003.2031.437925, doi:10.1101/2021.03.31.437925 (2021).

819 9 Motozono, C. *et al.* An emerging SARS-CoV-2 mutant evading cellular immunity and  
820 increasing viral infectivity. *bioRxiv*, 2021.2004.2002.438288, doi:10.1101/2021.04.02.438288  
821 (2021).

822 10 Hadfield, J. *et al.* Nextstrain: real-time tracking of pathogen evolution. *Bioinformatics* **34**,  
823 4121-4123, doi:10.1093/bioinformatics/bty407 (2018).

824 11 JHU. CORONA VIRUS RESOURCE CENTRE, <<https://coronavirus.jhu.edu/map.html>> (2021).

825 12 Madhi, S. A. *et al.* Efficacy of the ChAdOx1 nCoV-19 Covid-19 Vaccine against the B.1.351  
826 Variant. *N Engl J Med*, doi:10.1056/NEJMoa2102214 (2021).

827 13 Kustin, T. *et al.* Evidence for increased breakthrough rates of SARS-CoV-2 variants of concern  
828 in BNT162b2 mRNA vaccinated individuals. *medRxiv*, 2021.2004.2006.21254882,  
829 doi:10.1101/2021.04.06.21254882 (2021).

830 14 Collier, D. A. *et al.* Age-related immune response heterogeneity to SARS-CoV-2 vaccine  
831 BNT162b2. *Nature*, doi:10.1038/s41586-021-03739-1 (2021).

832 15 Van Oekelen, O. *et al.* Highly variable SARS-CoV-2 spike antibody responses to two doses of  
833 COVID-19 RNA vaccination in patients with multiple myeloma. *Cancer Cell*,  
834 doi:10.1016/j.ccell.2021.06.014 (2021).

835 16 Faria, N. R. *et al.* Genomics and epidemiology of the P.1 SARS-CoV-2 lineage in Manaus,  
836 Brazil. *Science*, eabh2644, doi:10.1126/science.abh2644 (2021).

837 17 Hall, V. J. *et al.* COVID-19 vaccine coverage in health-care workers in England and  
838 effectiveness of BNT162b2 mRNA vaccine against infection (SIREN): a prospective,  
839 multicentre, cohort study. *Lancet* **397**, 1725-1735, doi:10.1016/S0140-6736(21)00790-X  
840 (2021).

841 18 Velumani, A. *et al.* SARS-CoV-2 Seroprevalence in 12 Cities of India from July-December  
842 2020. *medRxiv*, 2021.2003.2019.21253429, doi:10.1101/2021.03.19.21253429 (2021).

843 19 Rambaut, A. *et al.* A dynamic nomenclature proposal for SARS-CoV-2 lineages to assist  
844 genomic epidemiology. *Nat Microbiol* **5**, 1403-1407, doi:10.1038/s41564-020-0770-5 (2020).

845 20 Campbell, F. *et al.* Increased transmissibility and global spread of SARS-CoV-2 variants of  
846 concern as at June 2021. *Euro Surveill* **26**, doi:10.2807/1560-7917.ES.2021.26.24.2100509  
847 (2021).

848 21 Greaney, A. J. *et al.* Antibodies elicited by mRNA-1273 vaccination bind more broadly to the  
849 receptor binding domain than do those from SARS-CoV-2 infection. *Sci Transl Med* **13**,  
850 doi:10.1126/scitranslmed.abi9915 (2021).

851 22 Chen, P. *et al.* SARS-CoV-2 Neutralizing Antibody LY-CoV555 in Outpatients with Covid-19.  
852 *New England Journal of Medicine* **384**, 229-237, doi:10.1056/NEJMoa2029849 (2020).



- 853 23 Weinreich, D. M. *et al.* REGN-COV2, a Neutralizing Antibody Cocktail, in Outpatients with  
854 Covid-19. *New England Journal of Medicine* **384**, 238-251, doi:10.1056/NEJMoa2035002  
855 (2020).
- 856 24 Peacock, T. P. *et al.* The furin cleavage site in the SARS-CoV-2 spike protein is required for  
857 transmission in ferrets. *Nat Microbiol*, doi:10.1038/s41564-021-00908-w (2021).
- 858 25 Youk, J. *et al.* Three-Dimensional Human Alveolar Stem Cell Culture Models Reveal Infection  
859 Response to SARS-CoV-2. *Cell Stem Cell* **27**, 905-919 e910, doi:10.1016/j.stem.2020.10.004  
860 (2020).
- 861 26 Hoffmann, M. *et al.* SARS-CoV-2 Cell Entry Depends on ACE2 and TMPRSS2 and Is Blocked by  
862 a Clinically Proven Protease Inhibitor. *Cell* **181**, 271-280 e278, doi:10.1016/j.cell.2020.02.052  
863 (2020).
- 864 27 Papa, G. *et al.* Furin cleavage of SARS-CoV-2 Spike promotes but is not essential for infection  
865 and cell-cell fusion. *PLoS pathogens* **17**, e1009246, doi:10.1371/journal.ppat.1009246  
866 (2021).
- 867 28 Cattin-Ortolá, J. *et al.* Sequences in the cytoplasmic tail of SARS-CoV-2 Spike facilitate  
868 expression at the cell surface and syncytia formation. *bioRxiv*, 2020.2010.2012.335562,  
869 doi:10.1101/2020.10.12.335562 (2021).
- 870 29 Meng, B. *et al.* Recurrent emergence and transmission of a SARS-CoV-2 spike deletion  
871 H69/V70 and role in Alpha Variant B.1.1.7. *Cell reports*,  
872 doi:<https://doi.org/10.1016/j.celrep.2021.109292> (2021).
- 873 30 Winstone, H. *et al.* The Polybasic Cleavage Site in SARS-CoV-2 Spike Modulates Viral  
874 Sensitivity to Type I Interferon and IFITM2. *Journal of virology* **95**, e02422-02420,  
875 doi:10.1128/jvi.02422-20 (2021).
- 876 31 Kemp, S. *et al.* Recurrent emergence and transmission of a SARS-CoV-2 Spike deletion  
877 H69/V70. *bioRxiv*, 2020.2012.2014.422555, doi:10.1101/2020.12.14.422555 (2021).
- 878 32 Peacock, T. P. *et al.* The furin cleavage site of SARS-CoV-2 spike protein is a key determinant  
879 for transmission due to enhanced replication in airway cells. *bioRxiv* (2020).
- 880 33 Kemp, S. A. *et al.* SARS-CoV-2 evolution during treatment of chronic infection. *Nature*,  
881 doi:10.1038/s41586-021-03291-y (2021).
- 882 34 Meng, B. *et al.* Recurrent emergence of SARS-CoV-2 spike deletion H69/V70 and its role in  
883 the variant of concern lineage B.1.1.7. *Cell Reports*, 109292,  
884 doi:<https://doi.org/10.1016/j.celrep.2021.109292> (2021).
- 885 35 Bhojar, R. C. *et al.* High throughput detection and genetic epidemiology of SARS-CoV-2 using  
886 COVIDSeq next-generation sequencing. *PloS one* **16**, e0247115,  
887 doi:10.1371/journal.pone.0247115 (2021).
- 888 36 Bernal, J. L. *et al.* Effectiveness of COVID-19 vaccines against the B.1.617.2 variant. *medRxiv*,  
889 2021.2005.2022.21257658, doi:10.1101/2021.05.22.21257658 (2021).
- 890 37 Malani, A. *et al.* Seroprevalence of SARS-CoV-2 in slums versus non-slums in Mumbai, India.  
891 *Lancet Glob Health* **9**, e110-e111, doi:10.1016/S2214-109X(20)30467-8 (2021).
- 892 38 Wall, E. C. *et al.* Neutralising antibody activity against SARS-CoV-2 VOCs B.1.617.2 and  
893 B.1.351 by BNT162b2 vaccination. *Lancet*, doi:10.1016/S0140-6736(21)01290-3 (2021).
- 894 39 Planas, D. *et al.* Reduced sensitivity of infectious SARS-CoV-2 variant B.1.617.2 to  
895 monoclonal antibodies and sera from convalescent and vaccinated individuals. *bioRxiv*,  
896 2021.2005.2026.445838, doi:10.1101/2021.05.26.445838 (2021).
- 897 40 Lempp, F. A. *et al.* Membrane lectins enhance SARS-CoV-2 infection and influence the  
898 neutralizing activity of different classes of antibodies. *bioRxiv*, 2021.2004.2003.438258,  
899 doi:10.1101/2021.04.03.438258 (2021).
- 900 41 McCarthy, K. R. *et al.* Natural deletions in the SARS-CoV-2 spike glycoprotein drive antibody  
901 escape. *Science* (2020).
- 902 42 McCallum, M. *et al.* N-terminal domain antigenic mapping reveals a site of vulnerability for  
903 SARS-CoV-2. *Cell* **184**, 2332-2347 e2316, doi:10.1016/j.cell.2021.03.028 (2021).

904 43 Zeng, C. *et al.* SARS-CoV-2 Spreads through Cell-to-Cell Transmission. *bioRxiv*,  
905 2021.2006.2001.446579, doi:10.1101/2021.06.01.446579 (2021).

906 44 Jackson, L. *et al.* SARS-CoV-2 cell-to-cell spread occurs rapidly and is insensitive to antibody  
907 neutralization. *bioRxiv*, 2021.2006.2001.446516, doi:10.1101/2021.06.01.446516 (2021).

908 45 Peacock, T. P. *et al.* The furin cleavage site in the SARS-CoV-2 spike protein is required for  
909 transmission in ferrets. *Nat Microbiol* **6**, 899-909, doi:10.1038/s41564-021-00908-w (2021).

910 46 Johnson, B. A. *et al.* Loss of furin cleavage site attenuates SARS-CoV-2 pathogenesis. *Nature*  
911 **591**, 293-299, doi:10.1038/s41586-021-03237-4 (2021).

912 47 Braga, L. *et al.* Drugs that inhibit TMEM16 proteins block SARS-CoV-2 Spike-induced syncytia.  
913 *Nature*, doi:10.1038/s41586-021-03491-6 (2021).

914 48 Planas, D. *et al.* Reduced sensitivity of SARS-CoV-2 variant Delta to antibody neutralization.  
915 *Nature*, doi:10.1038/s41586-021-03777-9 (2021).

916 49 Group, R. C. *et al.* Casirivimab and imdevimab in patients admitted to hospital with COVID-  
917 19 (RECOVERY): a randomised, controlled, open-label, platform trial. *medRxiv*,  
918 2021.2006.2015.21258542, doi:10.1101/2021.06.15.21258542 (2021).

919 50 Kemp, S. A. *et al.* SARS-CoV-2 evolution during treatment of chronic infection. *Nature* **592**,  
920 277-282, doi:10.1038/s41586-021-03291-y (2021).

921 51 Shinde, V. *et al.* Efficacy of NVX-CoV2373 Covid-19 Vaccine against the B.1.351 Variant. *New*  
922 *England Journal of Medicine*, doi:10.1056/NEJMoa2103055 (2021).

923 52 Abu-Raddad, L. J., Chemaitelly, H. & Butt, A. A. Effectiveness of the BNT162b2 Covid-19  
924 Vaccine against the B.1.1.7 and B.1.351 Variants. *New England Journal of Medicine*,  
925 doi:10.1056/NEJMc2104974 (2021).

926 53 Sadoff, J. *et al.* Safety and Efficacy of Single-Dose Ad26.COV2.S Vaccine against Covid-19.  
927 *New England Journal of Medicine*, doi:10.1056/NEJMoa2101544 (2021).

928 54 Endo, A., Centre for the Mathematical Modelling of Infectious Diseases, C.-W. G., Abbott, S.,  
929 Kucharski, A. J. & Funk, S. Estimating the overdispersion in COVID-19 transmission using  
930 outbreak sizes outside China. *Wellcome Open Res* **5**, 67,  
931 doi:10.12688/wellcomeopenres.15842.3 (2020).

932 55 Katoh, K. & Standley, D. M. MAFFT multiple sequence alignment software version 7:  
933 improvements in performance and usability. *Mol Biol Evol* **30**, 772-780,  
934 doi:10.1093/molbev/mst010 (2013).

935 56 Minh, B. Q. *et al.* IQ-TREE 2: New models and efficient methods for phylogenetic inference in  
936 the genomic era. *bioRxiv*, 849372, doi:10.1101/849372 (2019).

937 57 Yu, G., Smith, D. K., Zhu, H., Guan, Y. & Lam, T. T. Y. ggtree: an R package for visualization  
938 and annotation of phylogenetic trees with their covariates and other associated data.  
939 *Methods in Ecology and Evolution* **8**, 28-36 (2017).

940 58 Shu, Y. & McCauley, J. GISAID: Global initiative on sharing all influenza data - from vision to  
941 reality. *Euro surveillance : bulletin Europeen sur les maladies transmissibles = European*  
942 *communicable disease bulletin* **22**, 30494, doi:10.2807/1560-7917.ES.2017.22.13.30494  
943 (2017).

944 59 Wrobel, A. G. *et al.* SARS-CoV-2 and bat RaTG13 spike glycoprotein structures inform on  
945 virus evolution and furin-cleavage effects. *Nat Struct Mol Biol* **27**, 763-767,  
946 doi:10.1038/s41594-020-0468-7 (2020).

947 60 Rihn, S. J. *et al.* A plasmid DNA-launched SARS-CoV-2 reverse genetics system and  
948 coronavirus toolkit for COVID-19 research. *PLoS Biol* **19**, e3001091,  
949 doi:10.1371/journal.pbio.3001091 (2021).

950 61 Vermeire, J. *et al.* Quantification of reverse transcriptase activity by real-time PCR as a fast  
951 and accurate method for titration of HIV, lenti- and retroviral vectors. *PLoS one* **7**, e50859-  
952 e50859, doi:10.1371/journal.pone.0050859 (2012).

953 62 Matsuyama, S. *et al.* Enhanced isolation of SARS-CoV-2 by TMPRSS2-expressing cells. *Proc*  
954 *Natl Acad Sci U S A* **117**, 7001-7003, doi:10.1073/pnas.2002589117 (2020).

- 63 Reed, L. J. & Muench, H. A Simple Method of Estimating Fifty Percent Endpoints. *Am J Hygiene* **27**, 493-497 (1938).
- 64 Motozono, C. *et al.* SARS-CoV-2 spike L452R variant evades cellular immunity and increases infectivity. *Cell Host Microbe*, doi:10.1016/j.chom.2021.06.006 (2021).
- 65 Shema Mugisha, C. *et al.* A simplified quantitative real-time PCR assay for monitoring SARS-CoV-2 growth in cell culture. *mSphere* **5**, doi:10.1128/mSphere.00658-20 (2020).
- 66 Schmidt, F. *et al.* Measuring SARS-CoV-2 neutralizing antibody activity using pseudotyped and chimeric viruses. 2020.2006.2008.140871, doi:10.1101/2020.06.08.140871 %J bioRxiv (2020).
- 67 Mlcochova, P. *et al.* Combined point of care nucleic acid and antibody testing for SARS-CoV-2 following emergence of D614G Spike Variant. *Cell Rep Med*, 100099, doi:10.1016/j.xcrm.2020.100099 (2020).
- 68 Ou, X. *et al.* Characterization of spike glycoprotein of SARS-CoV-2 on virus entry and its immune cross-reactivity with SARS-CoV. *Nat Commun* **11**, 1620, doi:10.1038/s41467-020-15562-9 (2020).
- 69 Kodaka, M. *et al.* A new cell-based assay to evaluate myogenesis in mouse myoblast C2C12 cells. *Experimental cell research* **336**, 171-181 (2015).
- 70 Papa, G. *et al.* Furin cleavage of SARS-CoV-2 Spike promotes but is not essential for infection and cell-cell fusion. *PLoS Pathogens* **17**, e1009246 (2021).
- 71 Buchrieser, J. *et al.* Syncytia formation by SARS-CoV-2-infected cells. *The EMBO journal* **39**, e106267 (2020).

## **INSACOG CONSORTIUM MEMBERS**

**NIBMG:** Saumitra Das, Arindam Maitra, Sreedhar Chinnaswamy, Nidhan Kumar Biswas;  
**ILS:** Ajay Parida, Sunil K Raghav, Punit Prasad;  
**InSTEM/ NCBS:** Apurva Sarin, Satyajit Mayor, Uma Ramakrishnan, Dasaradhi Palakodeti, Aswin Sai Narain Seshasayee;  
**CDFD:** K Thangaraj, Murali Dharan Bashyam, Ashwin Dalal;  
**NCCS:** Manoj Bhat, Yogesh Shouche, Ajay Pillai;  
**IGIB:** Anurag Agarwal, Sridhar Sivasubbu, Vinod Scaria;  
**NIV:** Priya Abraham, Potdar Varsha Atul, Sarah S Cherian;  
**NIMHANS:** Anita Sudhir Desai, Chitra Pattabiraman, M. V. Manjunatha, Reeta S Mani, Gautam Arunachal Udupi;  
**NCDC:** Sujeet Singh, Himanshu Chauhan, Partha Rakshit, Tanzin Dikid;  
**CCMB:** Vinay Nandicoori, Karthik Bharadwaj Tallapaka, Divya Tej Sowpati

## **INSACOG collaborating divisions and clinical partners**

Biotechnology division, NCDC: Hema Gogia, Hemlata Lall, Kalaiarasan Ponnusamy, Kaptan Verma, Mahesh S Dhar, Manoj K Singh, Meena Datta, Namita Soni, Namonarayan



996 Meena, Partha Rakshit, Preeti Madan, Priyanka Singh, Radhakrishnan V. S, Ramesh  
 997 Sharma, Rajeev Sharma, Robin Marwal, Sandhya Kabra, Sattender Kumar, Swati Kumari,  
 998 Uma Sharma, Urmila Chaudhary  
 999 Integrated Disease Surveillance Program (IDSP), NCDC, Central and State IDSP units  
 1000 Centre of Epidemiology, NCDC  
 1001  
 1002 Sri Ganga Ram Hospital, Rajinder Nagar, New Delhi: Dept of Clinical Microbiology &  
 1003 Immunology and Director Medical Hospital Administration, Chand Wattal, J K  
 1004 Oberoi, Neeraj Goel, Reena Raveendran, S. Datta  
 1005  
 1006 Northern Railway Central Hospital, Basant Lane, New Delhi: Meenakshi Agarwal  
 1007  
 1008 Indraprastha Apollo Hospitals, New Delhi: Administration and Microbiology department,  
 1009 Raju Vaishya  
 1010  
 1011  
 1012 **The Genotype to Phenotype Japan (G2P-Japan) Consortium members**  
 1013  
 1014 **The Institute of Medical Science, The University of Tokyo:** Jumpei Ito, Izumi Kimura,  
 1015 Keiya Uriu, Yusuke Kosugi, Mai Suganami, Akiko Oide, Miyabishara Yokoyama, Mika  
 1016 Chiba  
 1017 **Hiroshima University:** Ryoko Kawabata, Nanami Morizako  
 1018 **Tokyo Metropolitan Institute of Public Health:** Kenji Sadamasu, Hiroyuki Asakura, Mami  
 1019 Nagashima, Kazuhisa Yoshimura  
 1020 **University of Miyazaki:** Akatsuki Saito, Erika P Butlertanaka, Yuri L Tanaka  
 1021 **Kumamoto University:** Terumasa Ikeda, Chihiro Motozono, Hesham Nasser, Ryo Shimizu,  
 1022 Yue Yuan, Kazuko Kitazato, Haruyo Hasebe  
 1023 **Tokai University:** So Nakagawa, Jiaqi Wu, Miyoko Takahashi  
 1024 **Hokkaido University:** Takasuke Fukuhara, Kenta Shimizu, Kana Tsushima, Haruko Kubo  
 1025 **Kyoto University:** Kotaro Shirakawa, Yasuhiro Kazuma, Ryosuke Nomura, Yoshihito  
 1026 Horisawa, Akifumi Takaori-Kondo  
 1027 **National Institute of Infectious Diseases:** Kenzo Tokunaga, Seiya Ozono  
 1028

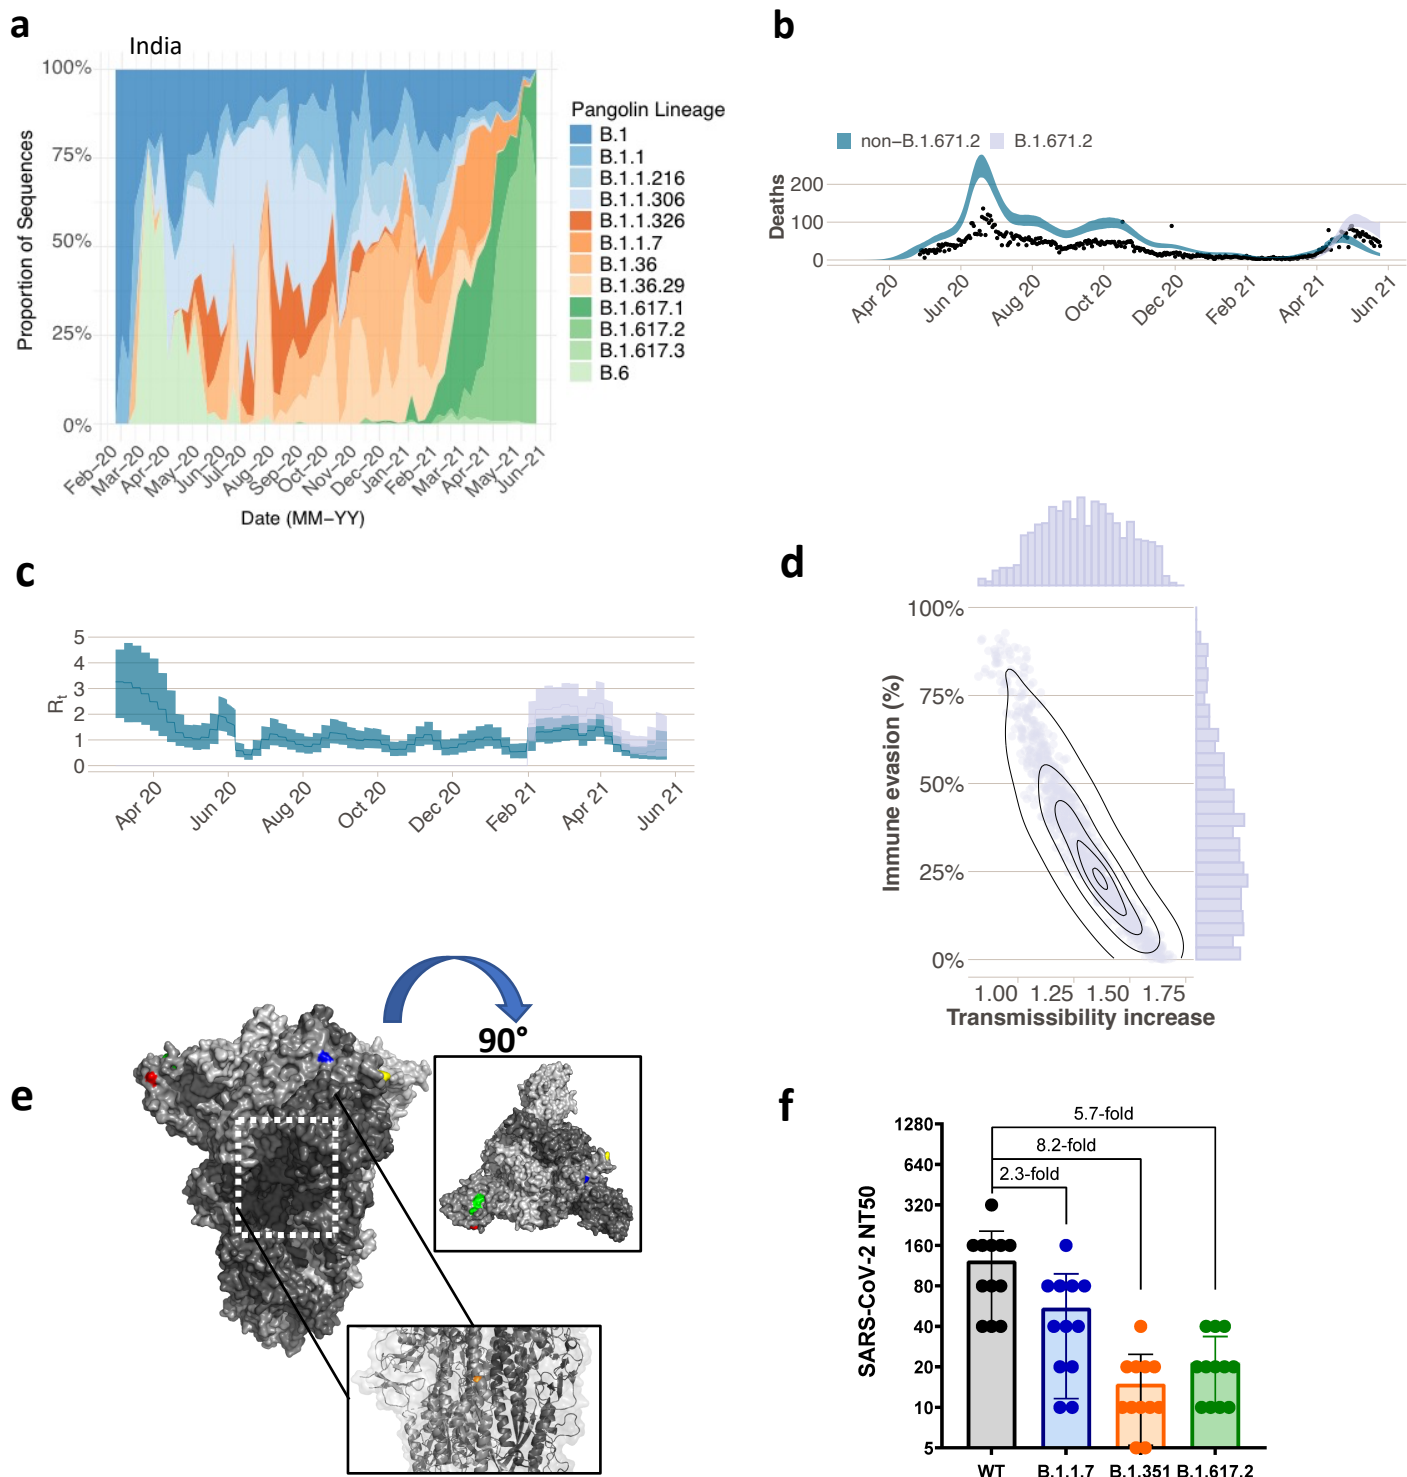

**Figure 1. Rapid Expansion of Delta variant B.1.617.2 in India with immune evasion and increased transmissibility** **a.** Proportion of lineages in incident cases of SARS-CoV-2 in India 2020-2021. **b-d.** Modelling resurgence of SARS-CoV-2 transmission in Mumbai and the epidemiological characteristics of B.1.617.2, inferred using a two category Bayesian transmission model<sup>1</sup> fitted to COVID-19 mortality, serological and genomic sequence data. The introduction date for B.1.671.2 is set to 31st Jan 2021 and 50% under-reporting in COVID-19 mortality data is assumed. **b.** Daily incidence of COVID-19 mortality with black dots showing the observed data. Coloured lines show the mean of posterior estimates of true number of deaths (i.e. after accounting for 50% underreporting) and shaded region representing the 95% CI. **c.** Bayesian posterior estimates of trends in the reproduction number ( $R_t$ ) for the B.1.671.2 and non- B.1.671.2 variant categories, **d.** Joint posterior distribution of the inferred transmissibility increase and degree of immune evasion (predominantly re-infection in India due to low vaccination coverage) for B.1.671.2 (relative to non- B.1.671.2 categories). Grey contours refer to posterior density intervals ranging from the 95% and 5% isoclines. Marginal posterior distributions for each parameter shown along each axis. **e.** Surface representation of the SARS-CoV-2 B.1.617.2 Spike trimer (PDB: 6ZGE). L19R (red), del157/158 (green) L452R (blue) and T478K (yellow). The white dashed box indicates the location of the D950N (orange) **f. Neutralization of Delta variant by convalescent human serum from mid-2020** in Vero-hACE2 TMPRSS2 cells. Fold-change in serum neutralisation 100 TCID<sub>50</sub> of B.1.17 (Alpha), B.1.351 (Beta) and B.1617.2 (Delta) variants relative to wild-type (IC19), n=12.

**a**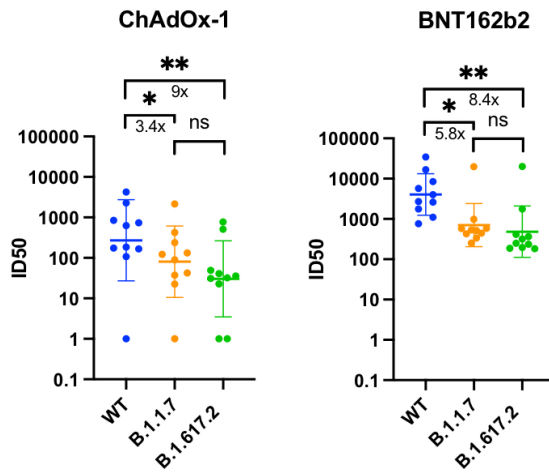**b**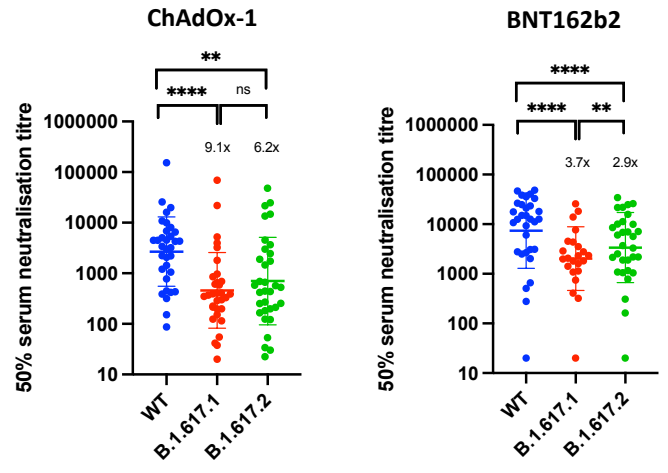**c**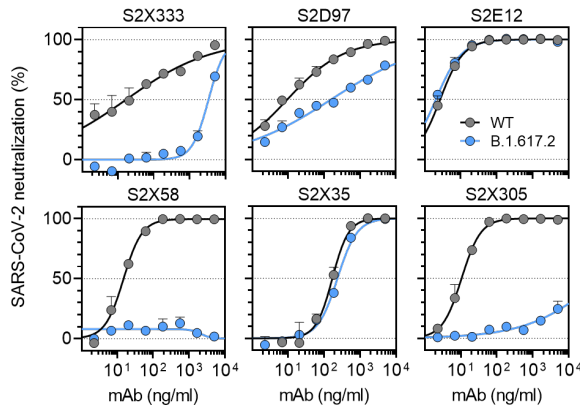**d**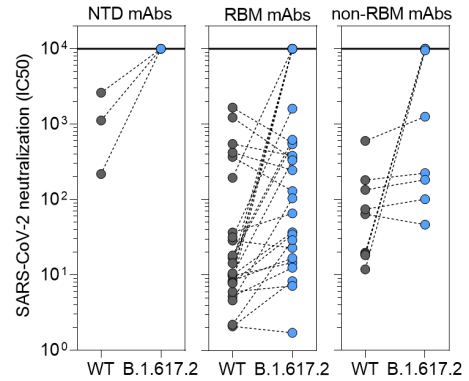**e**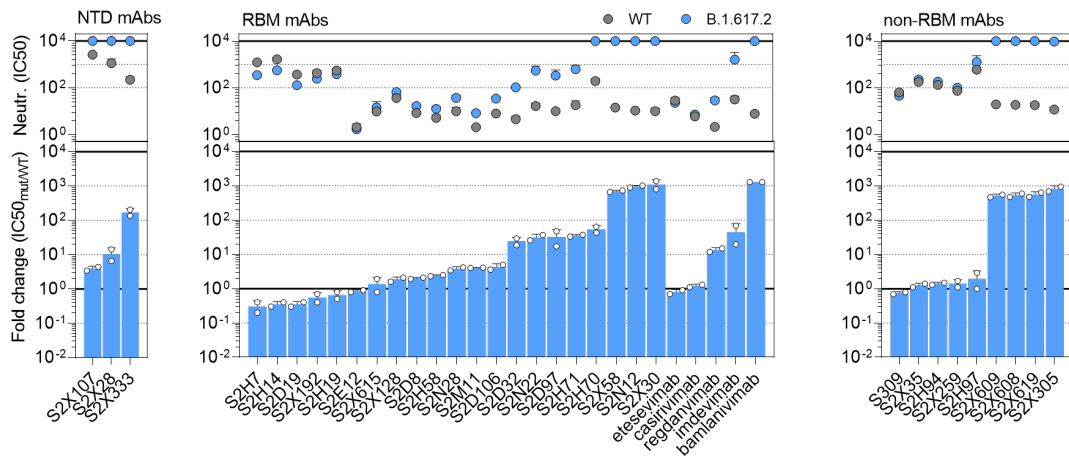

**Figure 2: Delta variant B.1.617.2 shows reduced sensitivity to neutralizing antibodies from sera derived following vaccination and to monoclonal antibodies.** **a.** Neutralisation of delta variant live virus isolate by sera from vaccinated individuals ( $n=10$  ChAdOx-1 or  $n=10$  BNT12b2) in comparison to B.1.1.7 and Wuhan-1 wild type (WT). 5-fold dilutions of vaccinee sera were mixed with wild type (WT) or viral variants (MOI 0.1) for 1h at 37°C. Mixture was added to Vero-hACE2/TMPRSS2 cells for 72h. Cells were fixed and stained with Coomassie blue and % of survival calculated. ID50 were calculated using nonlinear regression. Graph represents average of two independent experiments. **b.** Neutralisation of B.1.617 spike pseudotyped virus (PV) and wild type (WT, Wuhan-1 D614G) by vaccine sera ( $n=33$  ChAdOx-1 or  $n=32$  BNT162b2). GMT (geometric mean titre) with s.d are presented. Data representative of two independent experiments each with two technical replicates. \*\* $p<0.01$ , \*\*\*  $p<0.001$ , \*\*\*\* $p<0.0001$  Wilcoxon matched-pairs signed rank test, ns not significant. **c.** Neutralisation of WT D614 (black) and B.1.617.2 mutant (blue) pseudotyped SARS-CoV-2-VSV by 6 selected mAbs from one representative experiment out of 2 independent experiments. S2X333 is an NTD-specific mAb, S2D97, S2E12 and S2X58 are RBM-specific mAbs, while S2X35 and S2X305 are non-RBM mAbs. **d.** Neutralisation of WT and B.1.617.2 VSV by 38 mAbs targeting NTD ( $n=3$ ), RBM ( $n=26$ ) and non-RBM ( $n=9$ ). Shown are the mean IC50 values (ng/ml) from 2 independent experiments. Non-neutralising IC50 titers were set at  $10^4$  ng/ml. **e.** Neutralisation shown as mean IC50 values (upper panel) and average fold change of B.1.617.2 relative to WT (lower panel) of 38 mAbs tested in 2 independent experiments, including 5 clinical-stage mAbs tested using Vero E6 cells expressing TMPRSS2.

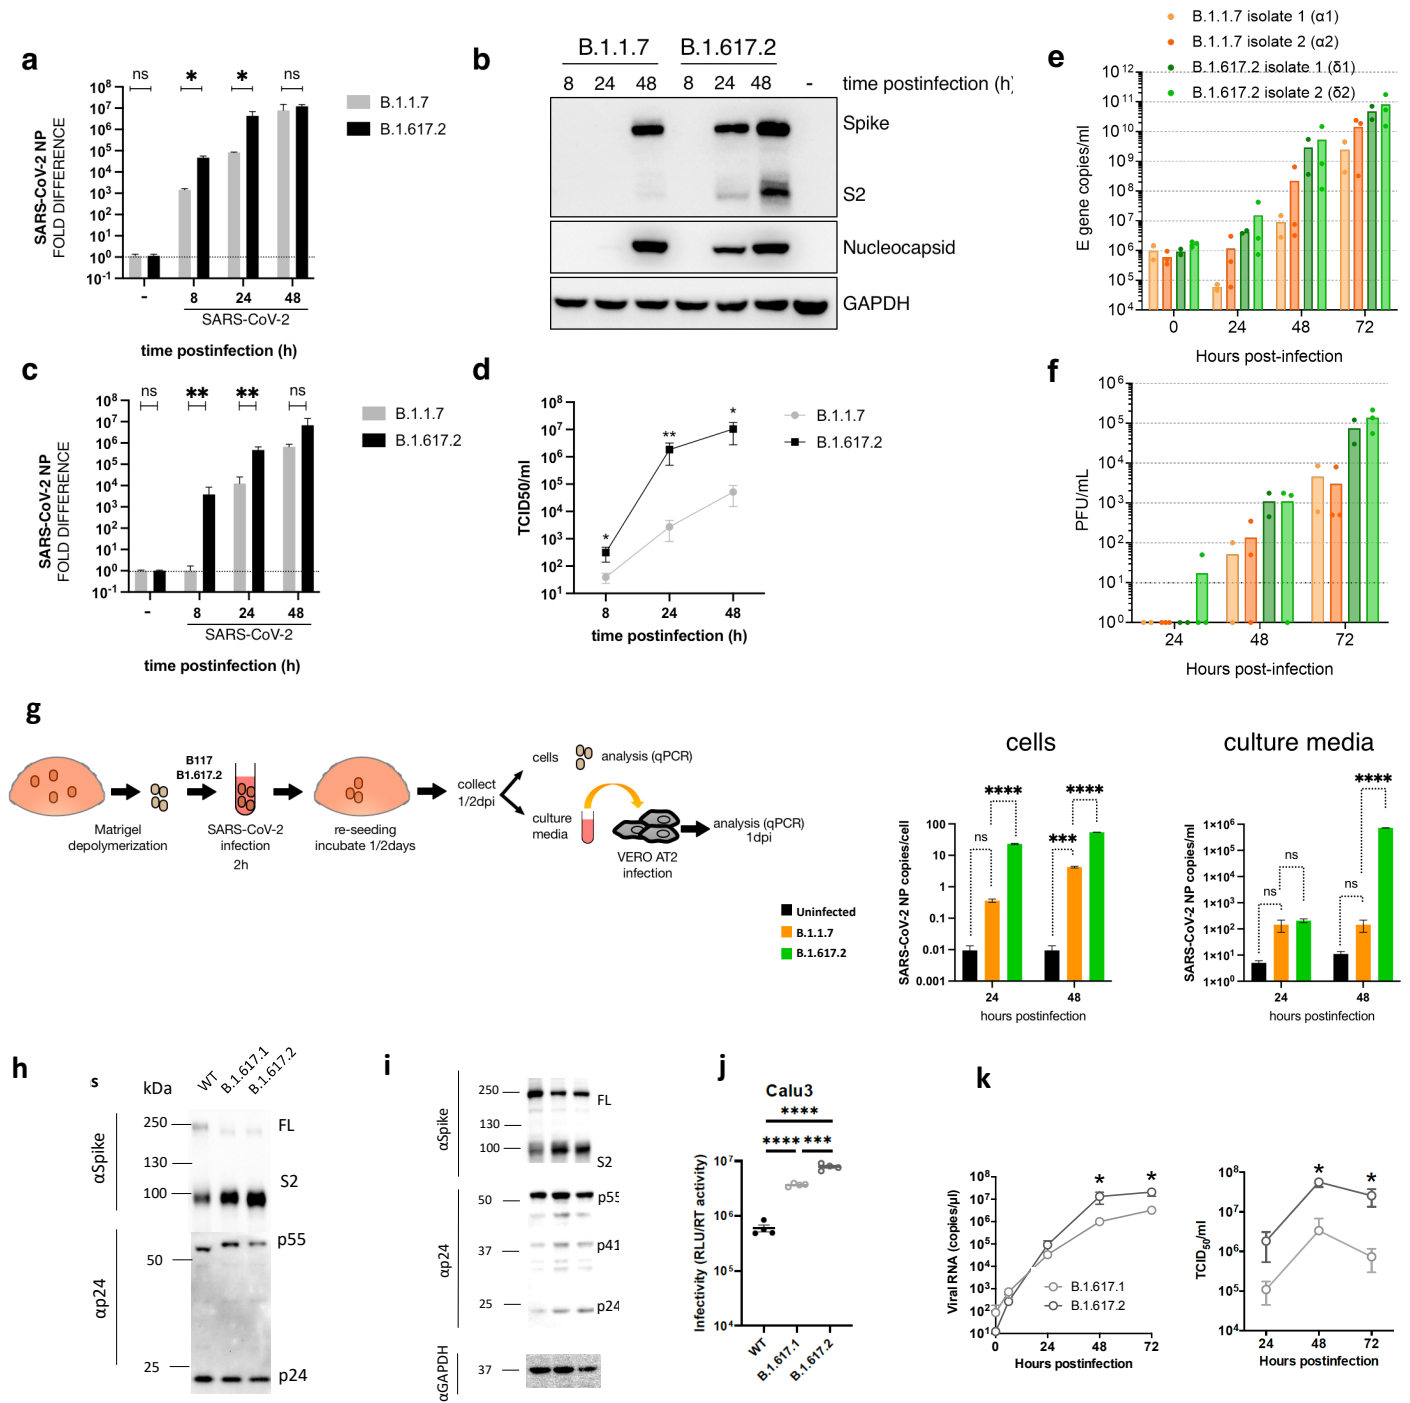

**Figure 3. a. SARS-CoV-2 B.1.617.2 Delta Variant replication and and spike mediated entry efficiency. a-d.** Live virus replication in Calu-3 lung cells comparing B.1.1.7 with B.1.617.2. Calu3 cells were infected with variants at MOI 0.1. Cells and supernatants containing released virus were collected for RNA isolation, western blot and TCID<sub>50</sub> at 8, 24 and 48h post-infection. **a.** viral loads were measured by qPCR in cell lysates. **b.** viral protein levels were detected in cell lysates. **c-d** Live virus produced from infected Calu3 cells was collected and used to infect permissive Vero Ace2/TMPRSS2 cells to measure **c.** viral loads in Vero cells or **d.** to measure TCID<sub>50</sub>/ml. **e-f.** Virus replication kinetics in human airway epithelial (HAE) system with air liquid interface ALI, using two B.1.617.2 isolates and two B.1.1.7 isolates. **g.** Live virus replication in airway epithelial organoid cultures. Airway epithelial organoids were infected with SARS-CoV-2 variants B.1.1.7 and B.1.617.2 at MOI 1. Cells were lysed 24 and 48h post-infection and total RNA isolated. qPCR was used to determine copies of nucleoprotein gene in organoid cells and infectivity of cell free virus measured by infection of Vero AT2 cells. Data represent are representative of two independent experiments. **h** and **i.** western blots of pseudotyped virus (PV) virions (**h**) and cell lysates (**i**) of 293T producer cells following transfection with plasmids expressing lentiviral vectors and SARS-CoV-2 S B.1.617.1 and Delta variant B.1.617.2 versus WT (Wuhan-1 with D614G), probed with antibodies for HIV-1 p24 and SARS-Cov-2 S2. **j.** Single round infectivity on Calu-3 by spike B.1.617.2 and B.1.617.1 versus WT D614G parental plasmid PV produced in 293T cells. Data are representative of three independent experiments. **k.** Growth kinetics of B.1.617.1 and B.1.617.2 variants. Viral isolates of B.1.617.1 and B.1.617.2 [200 50% tissue culture infectious dose (TCID<sub>50</sub>)] were inoculated into Calu-3 cells and the copy number of viral RNA in the culture supernatant was quantified by real-time RT-PCR over time. TCID<sub>50</sub> of released virus in supernatant was also measured over time. Assays were performed in quadruplicate. \*,  $P < 0.05$  by Mann-Whitney U test.. ns, non-significant; \*  $p < 0.05$ ; \*\*  $p < 0.01$ . \*\*\* $p < 0.001$ , \*\*\*\* $p < 0.0001$  (-) uninfected cells. Data are representative of two independent experiments

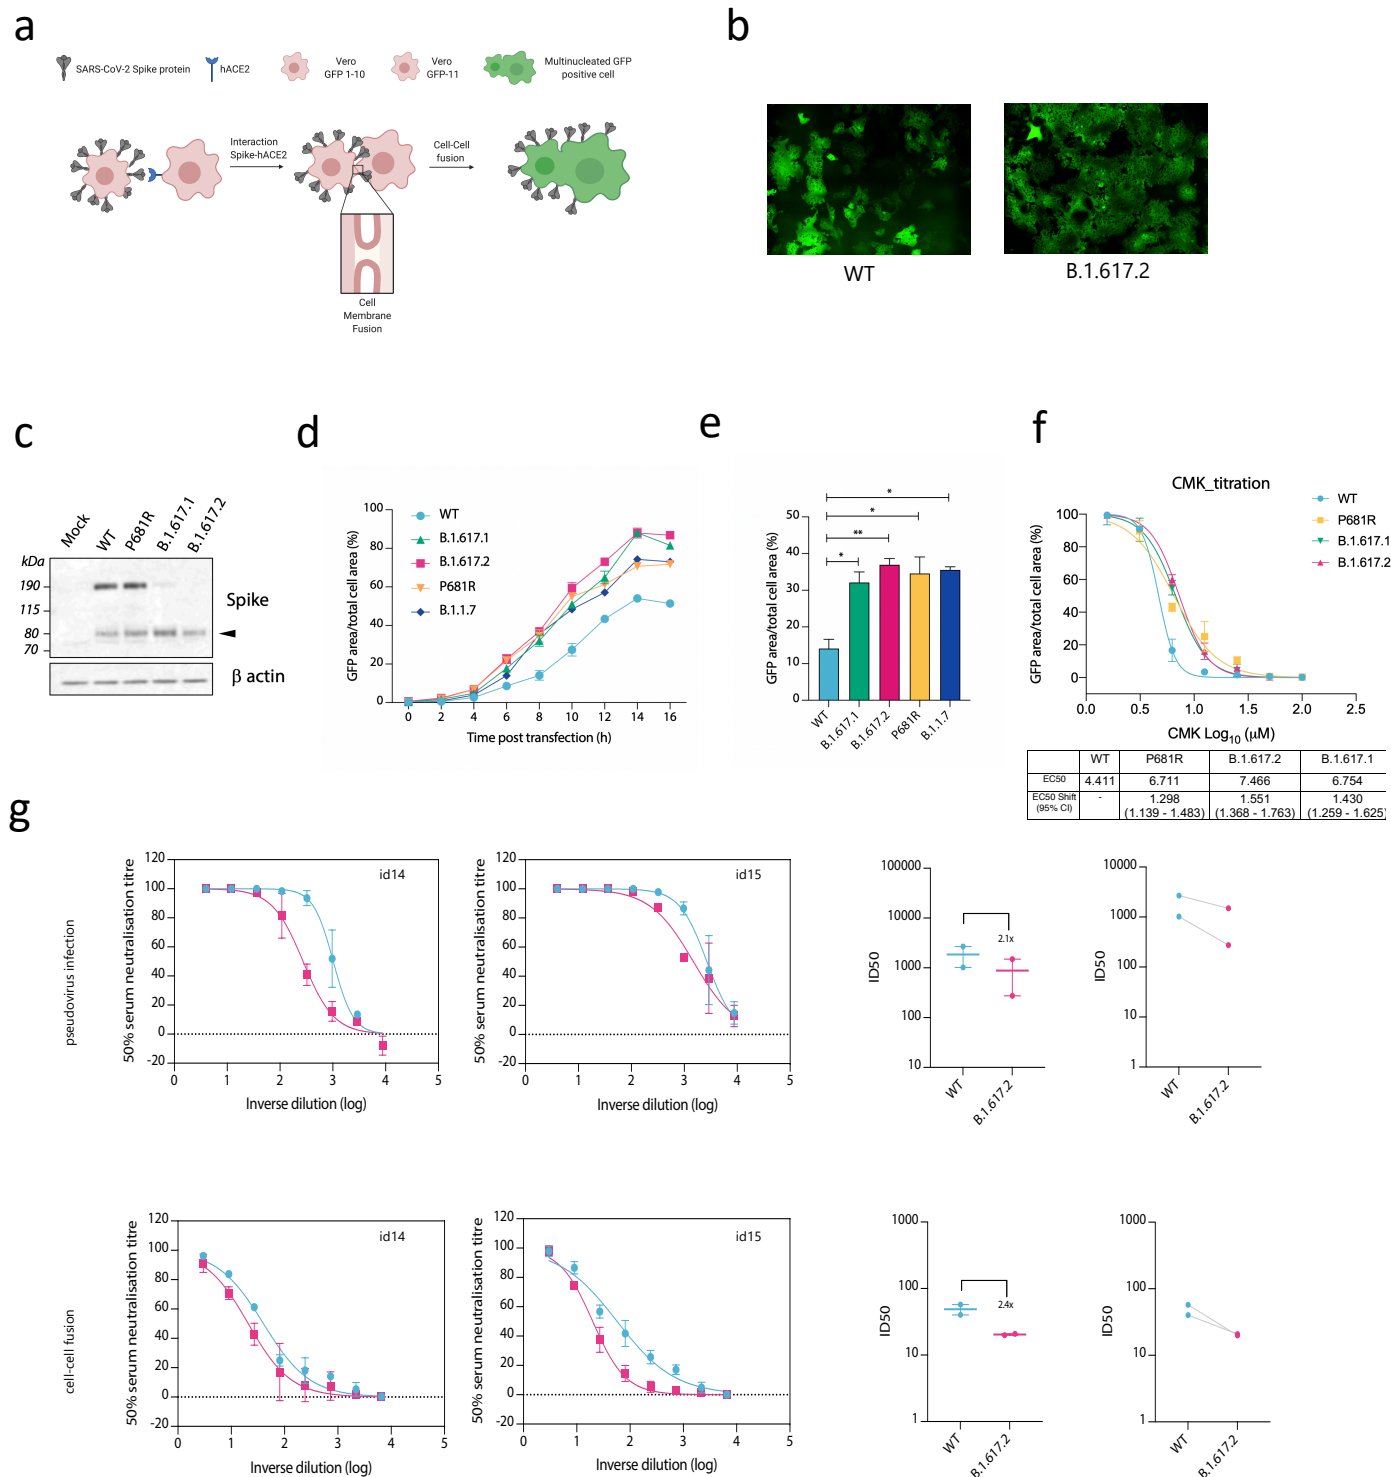

**Figure 4: B.1.617.2 Delta variant spike confers accelerated cell-cell fusion activity that can be blocked by anti-spike neutralising antibodies in sera. a.** Schematic of cell-cell fusion assay. **b.** Reconstructed images at 10 hours of GFP positive syncytia formation. Scale bars represent 400 mm. **c.** western blot of cell lysates 48 hours after transfection of spike plasmids. Anti-S2 antibody. **d,e.** Quantification of cell-cell fusion kinetics showing percentage of green area to total cell area over time. Mean is plotted with error bars representing SEM. **f.** Sensitivity of fusion kinetics to furin inhibitor CMK as shown by titration of drug and measurement of fusion after 10hrs. Mean is plotted with error bars representing SEM. **g.** comparison of impact of post vaccine sera (n=2) on PV neutralisation (top) and cell-cell fusion (bottom), comparing WT and Delta variant B.1.617.2. Data are representative of at least two independent experiments.

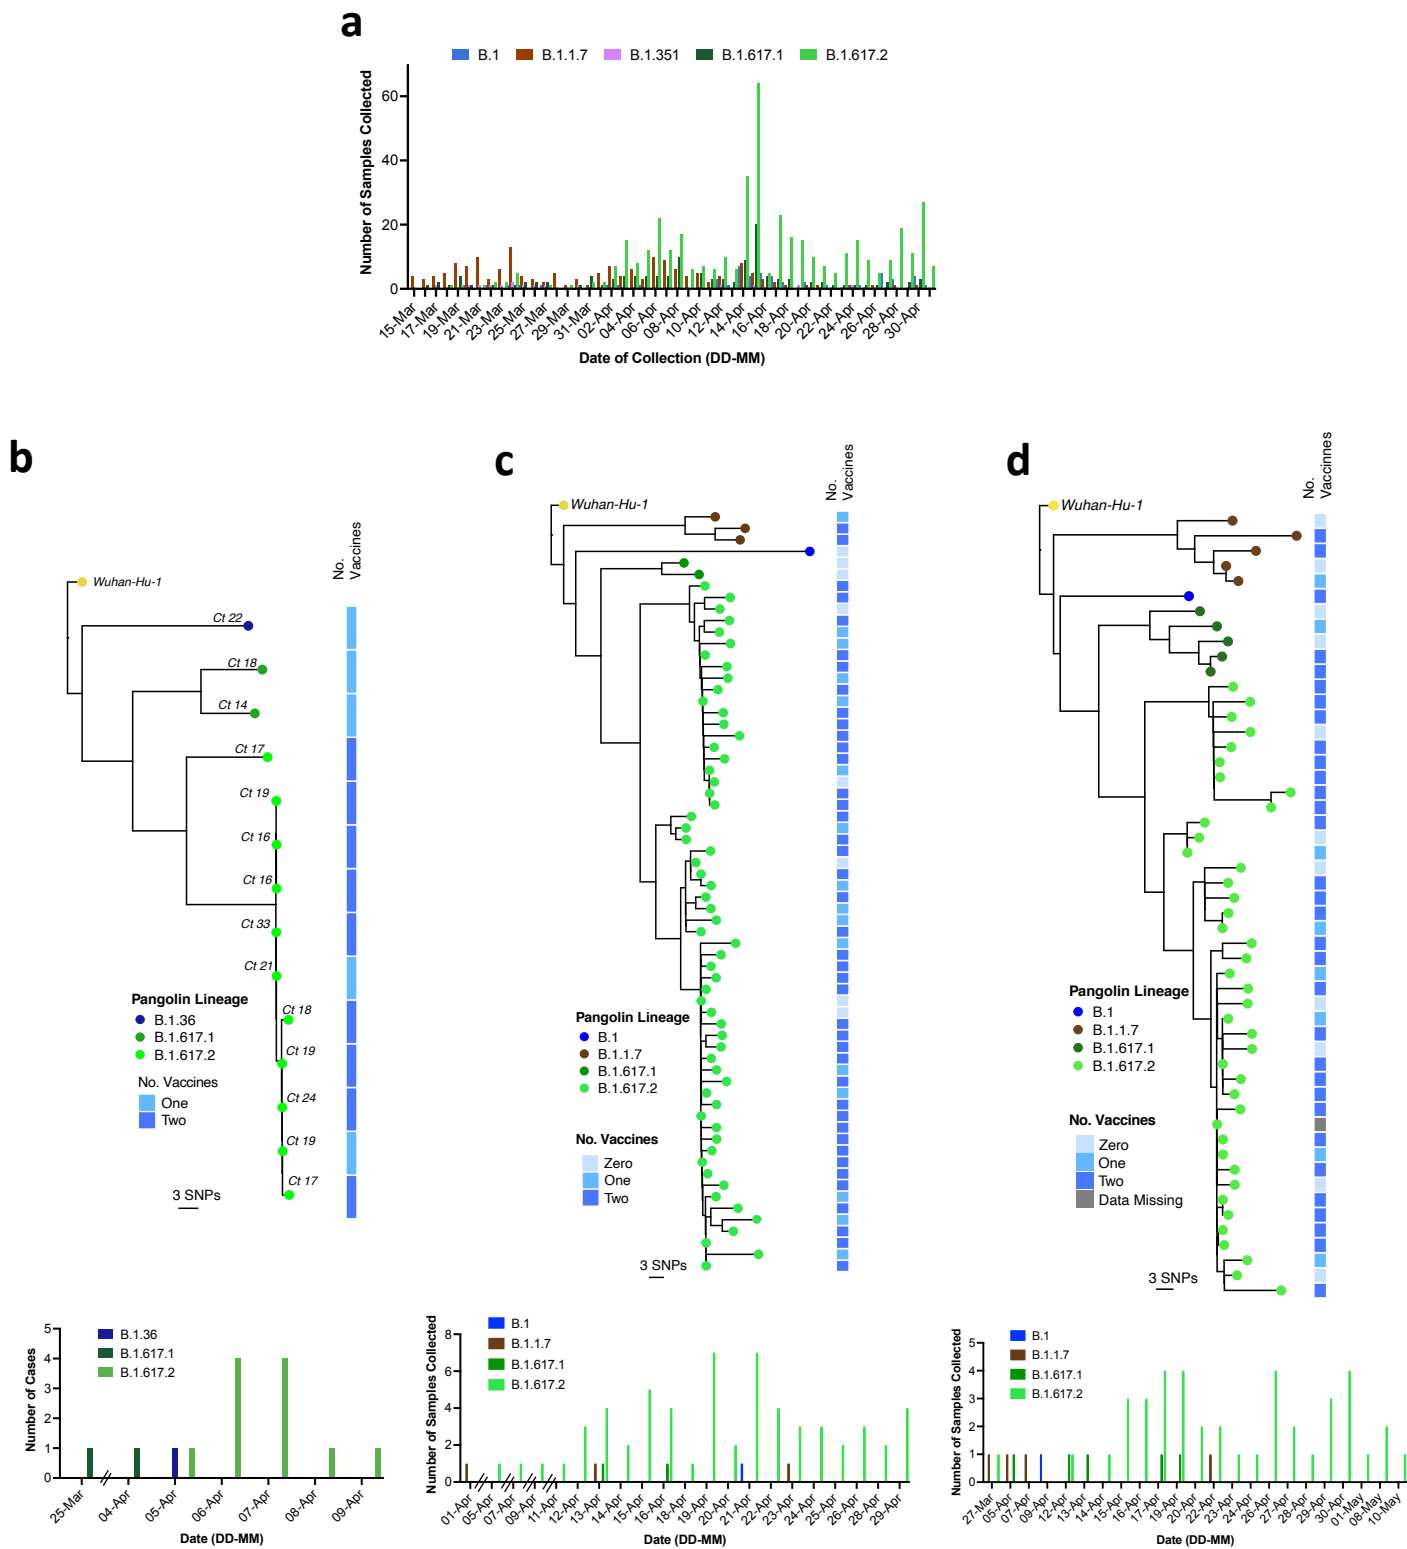



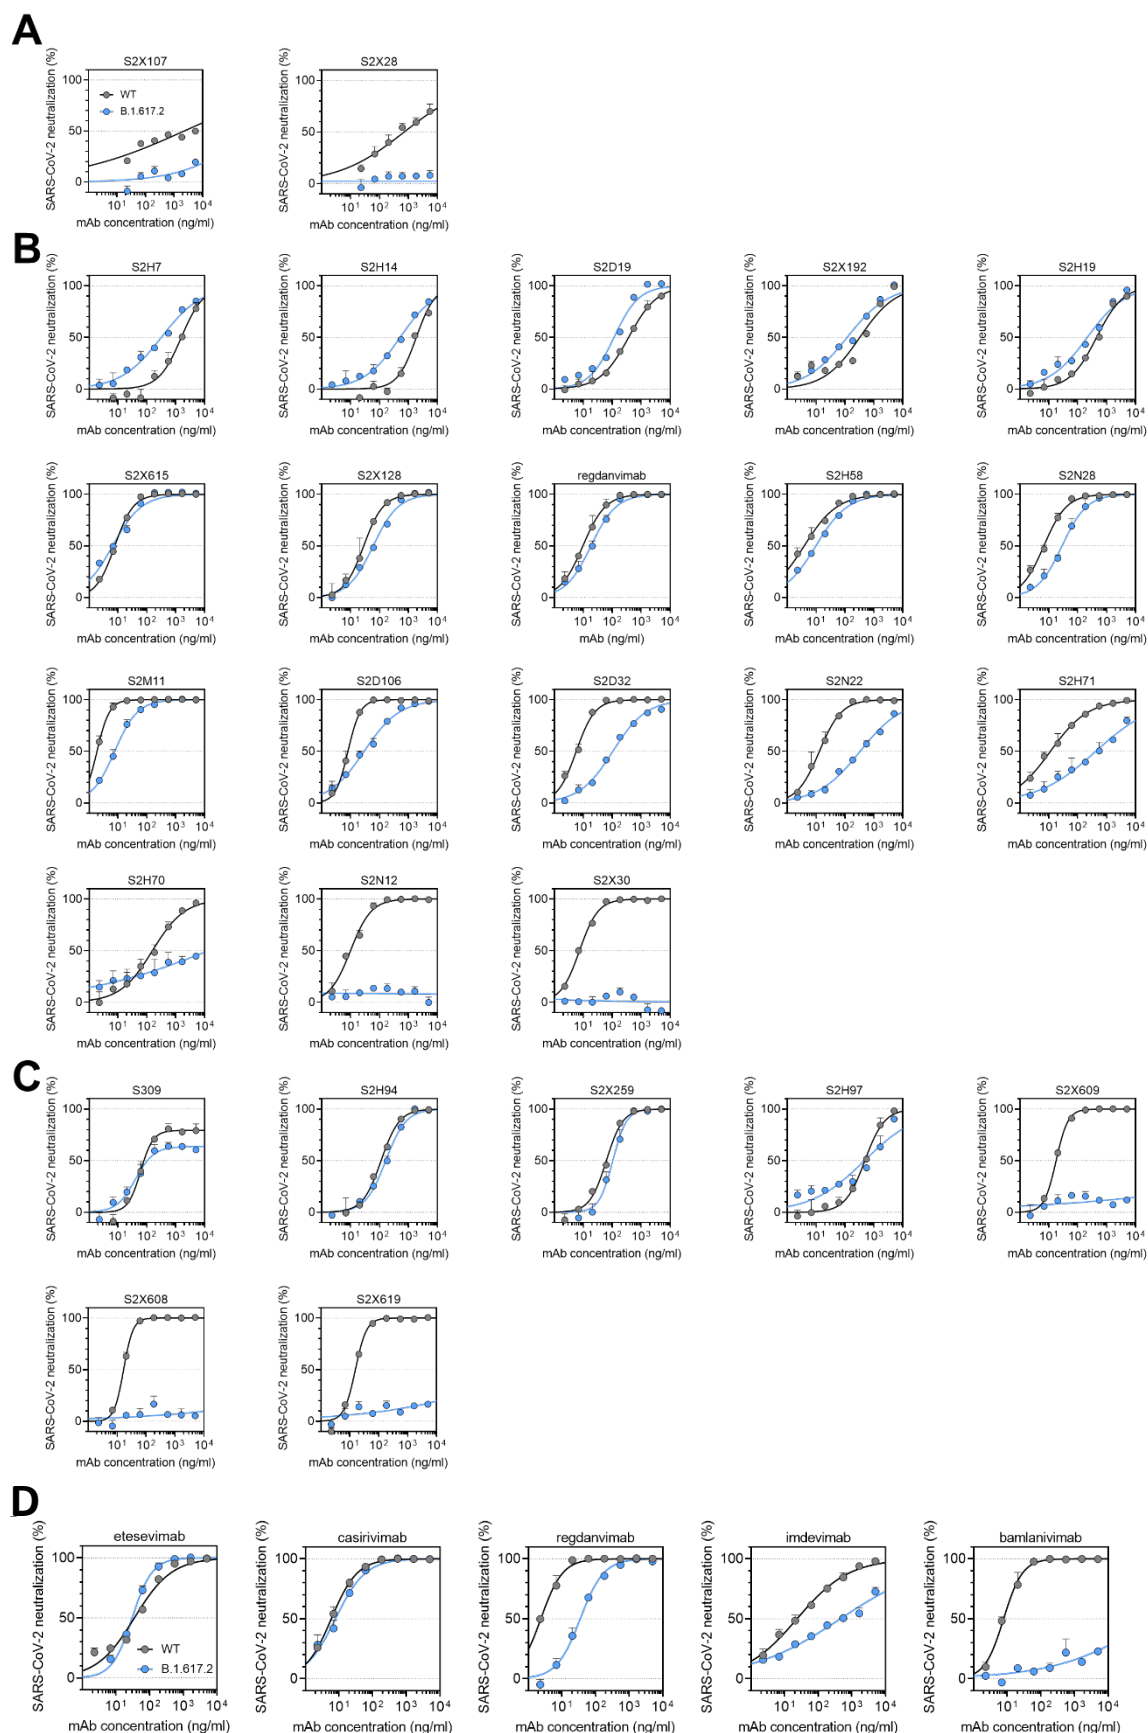

**Extended Data Figure 1. Neutralisation by a panel of NTD- and RBD-specific mAbs against WT and B.1.617.2 mutant SARS-CoV-2 pseudotyped viruses.** a-c, Neutralisation of WT (Wuhan-1 D614, black) and B.1.617.2 mutant (blue) pseudotyped SARS-CoV-2-VSV by 27 mAbs targeting NTD (A, n=3), RBM (B, n=18) and non-RBM (C, n=7). Shown is one representative experiment out of 2 independent experiments. **d.** **Neutralisation by 5 RBM clinical-stage mAbs against WT and B.1.617.2 mutant SARS-CoV-2 pseudotyped viruses.** Neutralisation of WT (black) and B.1.617.2 mutant (blue) pseudotyped SARS-CoV-2-VSV by 5 clinical-stage mAbs using Vero E6 cells expressing TMPRSS2.

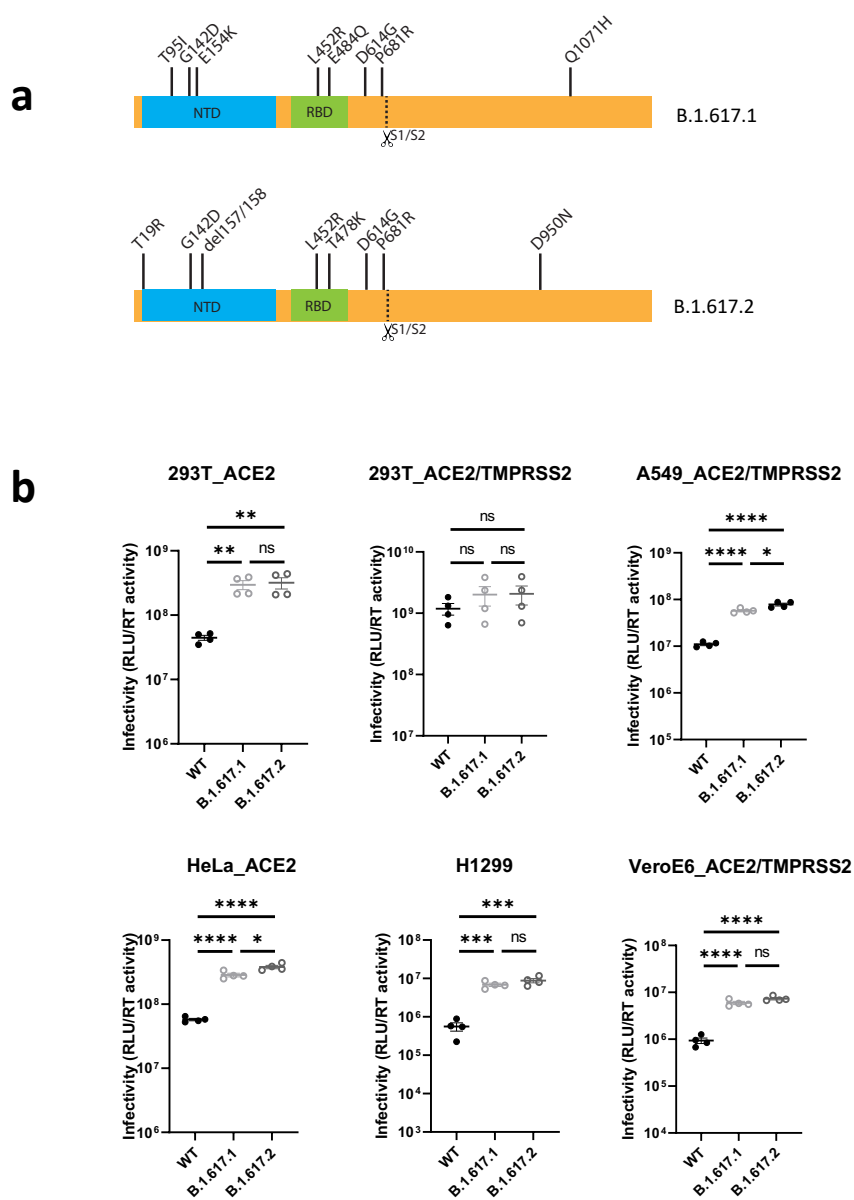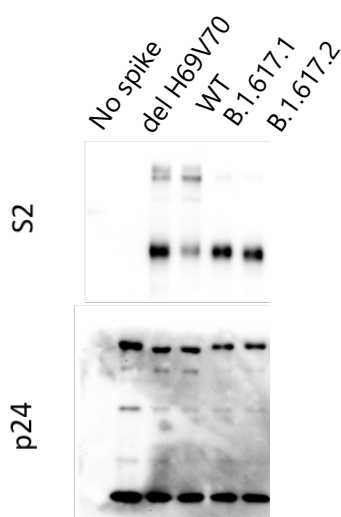

**Extended Data Figure 2: B.1.617.2 spike confers increased cell entry.** **a.** diagram showing mutations present in spike plasmids used for cell entry PV experiments **b.** Single round infectivity on different cell targets by spike B.1.617.1 and B.1.617.1 versus WT (Wuhan-1 D614G) PV produced in 293T cells. Data are representative of three independent experiments. Statistics were performed using unpaired Student t test. **c.** Representative western blotting of supernatants from transfected 293T probing for S2 and p24 in PV.



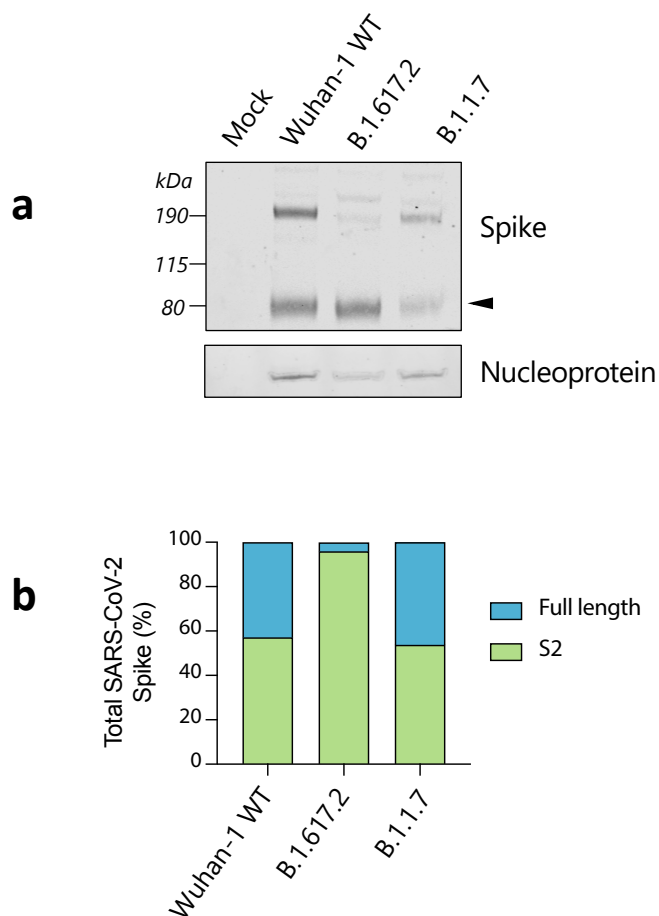

**Extended Data Figure 3. Spike cleavage in B.1.617.2 virions compared to B.1.17.** a. Representative western blot analysis of spike and nucleoprotein present in SARS-CoV-2 particles from the indicated viruses produced in Vero-hACE2-TMPRSS2 cells 48 hours post infection. The arrowhead identifies the S2 subunit. b. Quantification of cleaved and full-length spike of the indicated viruses.

a

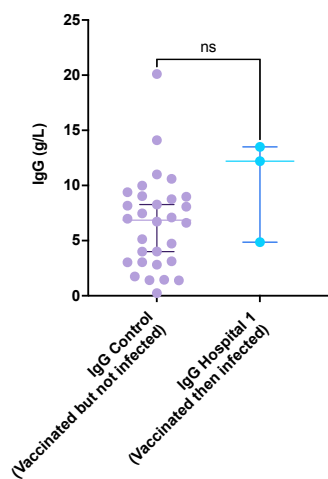

b

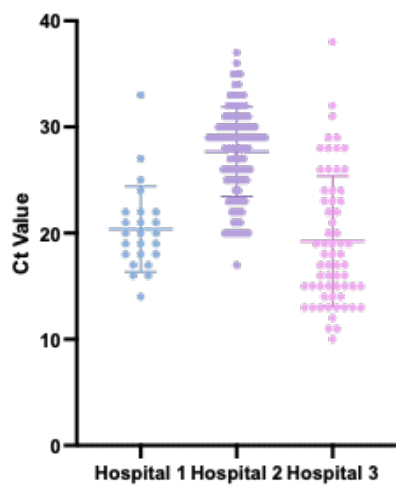

**Extended Data Figure 4. Breakthrough SARS-CoV-2 infections amongst vaccinated health care workers (HCW) a.** Comparison of IgG antibody titres between a control group of vaccinated individuals receiving two doses of ChadOx-1 who have not been infected with SARS-CoV-2, with vaccinated healthcare workers who had received two doses and subsequently tested positive for SARS-CoV-2. b. Ct values in nose/throat swabs testing positive by hospital. Bars represent Mean and 95% CI.

**Extended Data Table 1A.** Sensitivity analysis for the two-category model: B.1.617.2 and non-B.1.617.2 lineages under different combinations of B.1.617.2 lineage introduction dates and differing extents of mortality underreporting. The inferred changes in epidemiological characteristics of B.1.617.2 are presented via the estimated posterior mean and Bayesian 50% credible interval. Transmissibility increase is compared to co-circulating lineages in Mumbai.

| <b>Starting Date</b>            | <b>Under-Reporting Of Deaths</b> | <b>Evasion of protection from previous SARS-CoV-2 Infections (%)</b> | <b>Transmissibility Increase of B.1.617.2*</b> |
|---------------------------------|----------------------------------|----------------------------------------------------------------------|------------------------------------------------|
| <b>31<sup>st</sup> Jan 2021</b> | <b>30%</b>                       | 32% (18%-48%)                                                        | 2% (-19%-18%)                                  |
|                                 | <b>50%</b>                       | 38% (16%-55%)                                                        | 26% (11%-42%)                                  |
|                                 | <b>70%</b>                       | 35% (17%-50%)                                                        | 39% (29%-51%)                                  |
| <b>1<sup>st</sup> Jan 2021</b>  | <b>30%</b>                       | 17% (9%-25%)                                                         | 18% (0%-35%)                                   |
|                                 | <b>50%</b>                       | 24% (7%-34%)                                                         | 34% (20%-50%)                                  |
|                                 | <b>70%</b>                       | 32% (19%-45%)                                                        | 37% (28%-47%)                                  |
| <b>15<sup>th</sup> Dec 2020</b> | <b>30%</b>                       | 10% (5%-15%)                                                         | 28% (17%-42%)                                  |
|                                 | <b>50%</b>                       | 28% (11%-39%)                                                        | 27% (16%-41%)                                  |
|                                 | <b>70%</b>                       | 26% (9%-38%)                                                         | 40% (31%-50%)                                  |
| <b>1<sup>st</sup> Dec 2020</b>  | <b>30%</b>                       | 5% (3%-7%)                                                           | 39% (31%-47%)                                  |
|                                 | <b>50%</b>                       | 14% (4%-21%)                                                         | 40% (33%-50%)                                  |
|                                 | <b>70%</b>                       | 24% (9%-35%)                                                         | 39% (31%-49%)                                  |

**Extended Data Table 1B.** Sensitivity of the inferred increase in transmissibility and evasion of cross-immunity of the B.1.617.2 lineage, under varying transmissibility increase prior assumptions. Transmissibility increase is compared to co-circulating lineages in Mumbai. The estimated posterior mean and Bayesian 50% credible interval is shown for all inferred characteristics.

| <b>Transmissibility<br/>increase prior</b> | <b>Evasion of<br/>protection from<br/>previous SARS-<br/>CoV-2<br/>Infections (%)</b> | <b>Transmissibility<br/>Increase of<br/>B.1.617.2*</b> |
|--------------------------------------------|---------------------------------------------------------------------------------------|--------------------------------------------------------|
| <b>LogNormal(0,0.25)</b>                   | 33% (13%-54%)                                                                         | 27% (16%-48%)                                          |
| <b>Gamma(5,5)</b>                          | 38% (16%-55%)                                                                         | 26% (11%-42%)                                          |
| <b>Normal<sup>+</sup>(1,1)</b>             | 29% (13%-43%)                                                                         | 44% (35%-54%)                                          |

**Extended Data Table 1C.** Sensitivity of the inferred increase in transmissibility and evasion of cross-immunity of the B.1.617.2 lineage, under varying cross-immunity prior assumptions. Transmissibility increase is compared to co-circulating lineages in Mumbai. The under reporting is 50% and starting date is 31<sup>st</sup> Jan 2021, same as in Figure 1(b). The results are presented as the estimated posterior mean and Bayesian 50% credible interval.

| <b>Degree of Cross-<br/>protection prior</b> | <b>Evasion of<br/>protection from<br/>previous SARS-<br/>CoV-2<br/>Infections (%)</b> | <b>Transmissibility<br/>Increase from<br/>B.1.617.2*</b> |
|----------------------------------------------|---------------------------------------------------------------------------------------|----------------------------------------------------------|
| <b>Beta(2,1)</b>                             | 38% (16%-55%)                                                                         | 26% (11%-42%)                                            |
| <b>Beta(3,1)</b>                             | 25% (11%-35%)                                                                         | 47% (40%-55%)                                            |
| <b>Beta(4,1)</b>                             | 23% (7%-33%)                                                                          | 48% (41%-57%)                                            |
| <b>Beta(5,1)</b>                             | 16% (6%-24%)                                                                          | 52% (47%-59%)                                            |

**Extended Data Table 2** Demographic information for individuals undergoing two dose SARS-CoV-2 vaccination with ChAdOx-1 or BNT162b2

|                                                                     | ChAdOx-1<br>(N=33)    | BNT162b2<br>(N=32)     | P. value            |
|---------------------------------------------------------------------|-----------------------|------------------------|---------------------|
| Female (%)                                                          | 18 (54.5)             | 13 (40.6)              | 0.38 <sup>a</sup>   |
| Median Age <i>Years</i> (IQR)                                       | 67 (64 - 71)          | 71 (46 -83)            | 0.74 <sup>b</sup>   |
| Median time <i>in Days</i> since dose 2 (IQR)                       | 31 (21 -38)           | 27 (24 -29)            | 0.15 <sup>b</sup>   |
| Serum Geometric Mean Titre<br><i>GMT</i> for delta variant (95% CI) | 654<br>(313 -1365)    | 3372<br>(1856 - 6128)  | 0.0006 <sup>b</sup> |
| Serum Geometric Mean Titre<br><i>GMT</i> for WT (95% CI)            | 2625<br>(1492 - 4618) | 7393<br>(3893 - 14041) | 0.0030 <sup>b</sup> |

<sup>a</sup>Chi-square test, <sup>b</sup> Mann-Whitney test

| mAb          | Domain/s<br>ite | IC50 WT<br>(ng/ml) | IC50 B.1.617.2<br>(ng/ml) | VH usage (%<br>id.) | Source (DSO)                    | ACE2<br>blocking | Ref.                                     |
|--------------|-----------------|--------------------|---------------------------|---------------------|---------------------------------|------------------|------------------------------------------|
| S2X107       | NTD             | 2611.00            | 10000.00                  | 4-38-2 (97)         | Sympt. (75)                     | Neg.             | McCallum et al.                          |
| S2X28        | NTD             | 1121.30            | 10000.00                  | 3-30 (97.9)         | Sympt. (48)                     | Neg.             | McCallum et al.                          |
| S2X333       | NTD             | 217.95             | 35016.00                  | 3-33 (96.5)         | Sympt. (125)                    | Neg.             | McCallum et al.                          |
| S2H7         | RBM             | 1227.25            | 347.05                    | 3-66 (98.3)         | Sympt. (17)                     | Weak             | Thomson et al.                           |
| S2H14        | RBM             | 1666.00            | 566.40                    | 3-15 (100)          | Sympt. (17)                     | Weak             | Piccoli et al.; Thomson et al.           |
| S2D19        | RBM             | 369.55             | 129.95                    | 4-31 (99.7)         | Hosp. (49)                      | Moderate         | Thomson et al.                           |
| S2X192       | RBM             | 423.00             | 246.15                    | 1-69 (96.9)         | Sympt. (75)                     | Weak             | Thomson et al.                           |
| S2H19        | RBM             | 549.25             | 382.45                    | 3-15 (98.6)         | Sympt. (45)                     | Weak             | Thomson et al.                           |
| S2E12        | RBM             | 2.09               | 1.72                      | 1-58 (97.6)         | Hosp. (51)                      | Strong           | Thomson et al.; Tortorici et al.         |
| S2X615       | RBM             | 9.80               | 14.59                     | 3-11 (94.8)         | Sympt. (271)                    | Strong           | Collier et al.                           |
| S2X128       | RBM             | 36.82              | 65.97                     | 1-69-2 (97.6)       | Sympt. (75)                     | Strong           | Thomson et al.                           |
| S2D8         | RBM             | 8.44               | 16.78                     | 3-23 (96.5)         | Hosp. (49)                      | Strong           | Thomson et al.                           |
| S2H58        | RBM             | 5.21               | 12.55                     | 1-2 (97.9)          | Sympt. (45)                     | Strong           | Thomson et al.                           |
| S2N28        | RBM             | 10.05              | 36.95                     | 3-30 (97.2)         | Hosp. (51)                      | Strong           | Thomson et al.                           |
| S2M11        | RBM             | 2.07               | 8.32                      | 1-2 (96.5)          | Hosp. (46)                      | Weak             | Thomson et al.; Tortorici et al.         |
| S2D106       | RBM             | 8.0                | 34.6                      | 1-69 (97.2)         | Hosp. (98)                      | Strong           | Thomson et al.                           |
| S2D32        | RBM             | 4.6                | 104.6                     | 3-49 (98.3)         | Hosp. (49)                      | Strong           | Thomson et al.                           |
| S2N22        | RBM             | 16.8               | 543.4                     | 3-23 (96.5)         | Hosp. (51)                      | Strong           | Thomson et al.                           |
| S2D97        | RBM             | 10.0               | 332.9                     | 2-5 (96.9)          | Hosp. (98)                      | Weak             | Thomson et al.                           |
| S2H71        | RBM             | 18.2               | 622.8                     | 2-5 (99)            | Sympt. (45)                     | Moderate         | Thomson et al.                           |
| S2H70        | RBM             | 194.9              | 10000.0                   | 1-2 (99)            | Sympt. (45)                     | Weak             | Thomson et al.                           |
| S2X58        | RBM             | 14.4               | 10000.0                   | 1-46 (99)           | Sympt. (48)                     | Strong           | Thomson et al.                           |
| S2N12        | RBM             | 10.6               | 10000.0                   | 4-39 (97.6)         | Hosp. (51)                      | Strong           | Thomson et al.                           |
| S2X30        | RBM             | 10.0               | 10000.0                   | 1-69 (97.9)         | Sympt. (48)                     | Strong           | Thomson et al.                           |
| etesevimab   | RBM             | 28.7               | 23.0 / 10.3*              | 3-66 (99.7)         | Sympt. (?)<br>Immunized<br>mice | Strong           | R. Shi et al. Nature 2020                |
| casirivimab  | RBM             | 6.0                | 7.2 / 3.5*                | 3-30 (98.6)         | Immunized<br>mice               | Strong           | J. Hansen et al. Science 2020            |
| regdanvimab  | RBM             | 2.2                | 29.2 / 16.3*              | 2-70 (?)            | Sympt. (?)                      | Strong           |                                          |
| imdevimab    | RBM             | 31.9               | 1607.2 / 45.4*            | 3-11 (98.6)         | Sympt. (?)                      | Strong           | J. Hansen et al. Science 2020            |
| bamlanivimab | RBM             | 7.8                | 10000 / 10000*            | 1-69 (99.7)         | Sympt. (?)                      | Strong           | Jones et al. Sci Transl Med 2021         |
| S309         | non-RBM         | 63.9               | 46.4                      | 1-18 (97.2)         | SARS-CoV                        | Weak             | Pinto et al.                             |
| S2X35        | non-RBM         | 181.2              | 224.6                     | 1-18 (98.6)         | Sympt. (48)                     | Strong           | Piccoli et al.                           |
| S2H94        | non-RBM         | 134.1              | 182.9                     | 3-23 (93.4)         | Sympt. (81)                     | Strong           | Thomson et al.                           |
| S2X259       | non-RBM         | 74.2               | 101.1                     | 1-69 (94.1)         | Sympt. (75)                     | Moderate         | Tortorici et al (BioRxiv 2021)           |
| S2H97        | non-RBM         | 599.3              | 1260.4                    | 5-51 (98.3)         | Sympt. (81)                     | Weak             | Collier et al.; Starr et al (BioRxiv 21) |
| S2X609       | non-RBM         | 19.7               | 10000.0                   | 1-69 (93.8)         | Sympt. (271)                    | Strong           | Collier et al.                           |
| S2X608       | non-RBM         | 18.9               | 10000.0                   | 1-33 (93.2)         | Sympt. (271)                    | Strong           | Collier et al.                           |
| S2X619       | non-RBM         | 18.2               | 10000.0                   | 1-69 (92.7)         | Sympt. (271)                    | Strong           | Collier et al.                           |
| S2X305       | non-RBM         | 11.8               | 9522.5                    | 1-2 (95.1)          | Sympt. (125)                    | Strong           | Collier et al.                           |

DSO, days after symptom onset. Sympt., symptomatic. Hosp., hospitalized. SARS-CoV, infected with SARS-CoV virus. \*clinical-stage mAbs tested with Vero E6 cells not expressing TMPRSS2

**Extended Data Table 3:** Monoclonal antibodies used in neutralisation assays against pseudotyped virus bearing spike from WT (Wuhan-1 D614G) or B.1.617.2.



**Extended Data Table 4A: Clusters of SARS-CoV-2 infections in three hospitals with near universal staff vaccination during first half of 2021.**

|                                         | B.1.617.2<br>(N= 112)         | Non-B.1.617.2<br>(N=20)                      | P value            |
|-----------------------------------------|-------------------------------|----------------------------------------------|--------------------|
| Median age <i>years</i> (IQR)           | 36.5 (27.0-49.5)              | 32.5 (27.5-44.0)                             | 0.56 <sup>a</sup>  |
| Female %                                | 51.8 (58)                     | 50.0 (10)                                    | 0.88 <sup>b</sup>  |
| Hospital %                              |                               |                                              |                    |
| 1                                       | 9.8 (11)                      | 15.0 (3)                                     | 0.15 <sup>b</sup>  |
| 2                                       | 53.6 (60)                     | 30.0 (6)                                     |                    |
| 3                                       | 36.6 (41)                     | 55.0 (11)                                    |                    |
| Median Ct value (IQR)                   | 22.5 (16.4-28.6) <sup>c</sup> | 19.8 (17.3-22.8)                             | 0.48               |
| Number of vaccines doses % <sup>†</sup> |                               |                                              | 0.005 <sup>b</sup> |
| 0                                       | 10.8 (12)                     | 35.0 (7)                                     |                    |
| 1                                       | 20.7 (23)                     | 30.0 (6)                                     |                    |
| 2                                       | 68.5 (76)                     | 35.0 (7)                                     |                    |
| Hospitalised %*                         |                               |                                              | 0.72 <sup>b</sup>  |
| No                                      | 95.5 (64)                     | 93.3 (14)                                    |                    |
| Yes                                     | 4.5 (3)                       | 6.7 (1)                                      |                    |
| Anti-Spike IgG GMT (95% CI)             | 15.5 (4.6-52.9) <sup>d</sup>  | 29.5 (0.0-2.4x10 <sup>6</sup> ) <sup>e</sup> | 0.69 <sup>a</sup>  |
| Median Symptom duration<br><i>days</i>  | 1.5 (1.0-3.0) <sup>f</sup>    | 1.0 (1.0-2.0) <sup>g</sup>                   | 0.66 <sup>a</sup>  |

<sup>a</sup> Wilcoxon rank-sum test. <sup>b</sup> Chi square test. <sup>c</sup> 111 of 112 available. <sup>d</sup> 11 of 112. <sup>e</sup> 2 of 20. <sup>f</sup> 63 of 112. <sup>g</sup> 12 of 20. <sup>†</sup> Vaccine status missing for 1 of 132. \*Hospitalisation data is unavailable from Hospital 1. IQR- interquartile range, GMT- geometric mean titre. CI- confidence interval.

**Extended Data Table 4B: Relative ChAdOx-1 vaccine efficacy against B.1.617.2 v non-B.1.617.2: Odds ratios for detection of B.1.617.2 relative to non-B.1.617.2 in vaccinated compared to unvaccinated individuals**

|              | B.1.617.2 | Non-B.1.617.2 | B.1.617.2: Non-B.1.617.2 | OR (95% CI)       | P value | aOR (95% CI)      | P value |
|--------------|-----------|---------------|--------------------------|-------------------|---------|-------------------|---------|
| Unvaccinated | 12        | 7             | 1.71                     | -                 |         | -                 |         |
|              |           |               |                          |                   |         |                   |         |
| Vaccinated   |           |               |                          |                   |         |                   |         |
| Dose 1       | 23        | 6             | 3.83                     | 2.24 (0.61-8.16)  | 0.22    | 2.06 (0.51-8.40)  | 0.31    |
| Dose 2       | 76        | 7             | 10.86                    | 6.33 (1.89-21.27) | 0.003   | 5.14 (1.32-20.0)  | 0.018   |
| Dose 1 and 2 | 99        | 13            | 7.62                     | 4.44 (1.48-13.30) | 0.008   | 3.59 (1.06-12.16) | 0.04    |

OR; odds ratio aOR; Adjusted odds ratio.

# Supplementary Material: Semi-Mechanistic SARS-CoV-2 Transmission Model

## 1 Model description

The model described here builds on a previously published model of SARS-CoV-2 transmission introduced in Flaxman et al, 2020 [1], subsequently extended into a two-category framework in Faria et al [2], 2020 to describe and characterise the dynamics of the Gamma variant in Manaus, Brazil. Replication code is available at [https://github.com/ImperialCollegeLondon/delta\\_modelling](https://github.com/ImperialCollegeLondon/delta_modelling).

In brief, the model describes two categories, denoted  $s \in \{1, 2\}$ . In our setting, category 2 is the Delta variant, and category 1 is a group for all other variants in circulation (wild type, Alpha, Beta, etc.). The reproduction number for the first category (before adjusting for susceptible depletion) is modelled as

$$R_{s=1,t} = \mu_0 2 \sigma(X_t), \quad (1)$$

where  $\mu_0$  is a scale parameter (3.3),  $\sigma$  is the logistic function, and  $X_t$  is a second-order autoregressive process with weekly time innovations, as specified in Unwin et al, 2020 [3].  $X_t$  therefore models  $R$  as a flexible differential function. The reproduction number for the second category is modelled as

$$R_{s=2,t} = \rho \mathbf{1}_{[t_2, \infty)} R_{1,t}, \quad (2)$$

with

$$\rho \sim \text{Gamma}(5, 5) \in [0, \infty), \quad (3)$$

where  $\rho$  is a parameter defining the relative transmissibility of category 2 compared to category 1,  $t_2$  is the date of emergence of category 2, and  $\mathbf{1}_{[t_2, \infty)}$  is an indicator function taking the value of 0 prior to  $t_2$ , and 1 thereafter, highlighting that category 2 does not contribute to the observed epidemic evolution before its emergence.

Infections arise for each category according to a discrete renewal process [4] with susceptible depletion

$$i_{s,t} = \left(1 - \frac{n_{s,t}}{N}\right) R_{s,t} \sum_{\tau < t} i_{s,\tau} g_{t-\tau}, \quad (4)$$

where  $N$  is the total population size,  $n_{s,t}$  is the total extent of population immunity to category  $s$  present at time  $t$ , and  $g$  is the generation interval distribution.

The susceptible depletion term for category  $s$  is modelled as

$$n_{s,t} = \sum_{\tau < t} i_{s,\tau} W_{t-\tau} + \beta_s (1 - \alpha_{s,t}) \sum_{\tau < t} i_{\setminus s,\tau} W_{t-\tau}. \quad (5)$$

under the assumption of symmetric cross-immunity between categories 1 and 2 with prior on the cross-immunity

$$\beta \sim \text{Beta}(2, 1). \quad (6)$$

$W_{t-\tau}$  is the time-dependent waning of immunity elicited by previous infection, which is modelled as a Rayleigh survival-type function with Rayleigh parameter of  $\sigma = 310$ , for which 50% of individuals are immune to reinfection by the same category after 1 year. The cross-immunity susceptible term  $\alpha_{s,t}$  is modelled as

$$\alpha_{s,t} = \frac{(1 - \beta_s) \sum_{\tau < t} i_{s,\tau} W_{t-\tau}}{N - \beta_s \sum_{\tau < t} i_{s,\tau} W_{t-\tau}}. \quad (7)$$

Infections of category 1 are seeded for six days at the start of the epidemic as

$$i_{1,t_{1..6}} \sim \text{Exponential}(1/\tau), \quad (8)$$

with

$$\tau \sim \text{Exponential}(0.03), \quad (9)$$

Infections of category 2 are seeded for one day only, the date of introduction  $t_2$ , as

$$i_{2,t_2} \sim \text{Normal}(0, 20^2) \in [1, \infty). \quad (10)$$

Non-unit seeding of category 2 and the diffuse prior represent our uncertainty in the precise date and magnitude of category 2's introduction/importation.

The model generates deaths via the following mechanistic relationship:

$$d_t = \sum_s \text{ifr}_s \sum_{\tau < t} i_{s,\tau} \pi_{t-\tau}. \quad (11)$$

The infection fatality ratios ( $\text{ifr}_s$ ) of each of the categories are given moderately informative priors:

$$\text{ifr}_s \sim \text{Normal}(0.3, 0.02^2) \in [0, 100] \quad (12)$$

with our central estimate based on the results of Brazeau et al [5] and adjusted for the demography of the city. We allow for some potential variation around this estimate however, with the prior providing some support for IFRs in the range 0.25% - 0.35%. A limitation of the model is the assumption of homogeneous exposure across subsets of the population.

The observation model uses three types of data from four sources.

**Likelihood component 1.** The likelihood for the expected deaths  $D_t$  is modelled with a negative binomial distribution,

$$D_t \sim \text{NegativeBinomial}(d_t(1 - \omega), d_t + \frac{d_t^2}{\phi}), \quad (13)$$

with mortality data  $d_t$ , dispersion prior

$$\phi \sim \text{Normal}(0, 5) \in [0, \infty). \quad (14)$$

and underreporting factor  $\omega$ , which describes the degree of death underascertainment, e.g. a value of 0.25 means 25% of COVID-19 deaths are not reported (due, e.g. to limited testing).

**Likelihood component 2.** Genomic data from individuals, where infections were sequenced and where the sequence was uploaded to GISAID, is modelled with a Binomial likelihood for the proportion of sequenced genomes identified as categories 1 and 2 at time  $t$ :

$$G_t^+ \sim \text{Binomial}(G_t^1 + G_t^2, \theta_t), \quad (15)$$

with counts for category  $i$  denoted  $G_t^i$ . The success probability for category 2 is modelled as the infection ratio

$$\theta_t = \frac{\tilde{i}_{2,t}}{\tilde{i}_{1,t} + \tilde{i}_{2,t}}, \quad (16)$$

where  $\tilde{i}_{s,t}$  is given by

$$\tilde{i}_{s,t} = \sum_{\tau \leq t} i_{s,\tau} \kappa_{t-\tau}, \quad (17)$$

to account for the time varying PCR positivity displayed over the natural course of a COVID-19 infection. The distribution  $\kappa$  describes the probability of being PCR positive over time following infection, and is based on [6].

### Likelihood component 3.

Serological data from two sources are incorporated in our modelling framework. The observed seropositivity ( $S_t$ ) on a given day,  $t$ , is modelled as follows

$$S_t \sim \text{Normal}\left(\sum_{\tau \leq t} i_{s,\tau} C_{t-\tau}, \sigma_s\right), \quad (18)$$

where  $C_{t-\tau}$  is the cumulative probability of an individual infected on day  $\tau$  having seroconverted by time  $t$ . This distribution is empirical and based on [7]. The  $\sigma_s$  is given a Gamma(5, 1) prior.

Eq (4) can be modified to account for population effects (decreasing susceptible population over time) such that no over-shooting happens due to discretization as follows [8, 9]:

$$i_{s,t} = (N - n_{s,t}) \left(1 - \exp\left(-\frac{i_{s,t}}{N}\right)\right), \quad (19)$$

The formula for  $i_{s,t}$  is derived from a continuous time model on  $[t-1, t]$ . This is to avoid discrete time effects such as infections going above the total population  $N$ . Specifically, we assume that the infections  $i(\Delta t)$  in  $[t-1, t-1+\Delta t]$  are given by the differential equation  $\partial i(\Delta t)/\partial \Delta t = i_t(1 - (n_{s,t} + i(\Delta t))/N)$ , which has the solution  $i(1) = i_t$  as above.

**Model Running and Inference** Parameter inference was carried out using the probabilistic programming language Stan [10], using an adaptive Hamiltonian Monte Carlo (HMC) sampler and implemented in RStan version 2.11 (R version 4.04). We ran 3 chains for 1000 iterations, with 500 iterations of warmup, to obtain a total of 1500 posterior samples which were used for subsequent inference and statistical analysis. Posterior convergence was assessed using the Rhat statistic (all of which were below 1.01) and by diagnosing divergent transitions of the HMC sampler.

## 2 Simulations

Using a simulation approach, we now assess whether our model can correctly recover the ground truth values for altered epidemiological characteristics, specifically changes in immune evasion and / or transmissibility. We use our model to simulate synthetic epidemics, keeping the start date for delta as 31<sup>st</sup> Jan 2021, ifr as 0.3% and 0.32% for non-delta and delta-strain respectively. We simulate two separate scenarios: A) with no chance of immune evasion and transmissibility increase of  $1.8x$ , and B) with 50% chance of immune evasion and transmissibility increase of  $1.6x$ . Simulated datasets and replication code are provided in the GitHub repository [http://github.com/ImperialCollegeLondon/delta\\_modelling](http://github.com/ImperialCollegeLondon/delta_modelling).

Ideally, fitting the model to synthetic data should succeed in correctly recovering the epidemiological quantities of interest; this sanity check gives us confidence that the model will be able to recover “ground truth” epidemiological characteristics when fit to real data, as in the main modeling analysis of the paper. The results are shown in Figure 1—the posterior mean estimates from the fitted model (red circles) recover the values used for the simulation (black circles), supporting the appropriateness of our modeling choices.

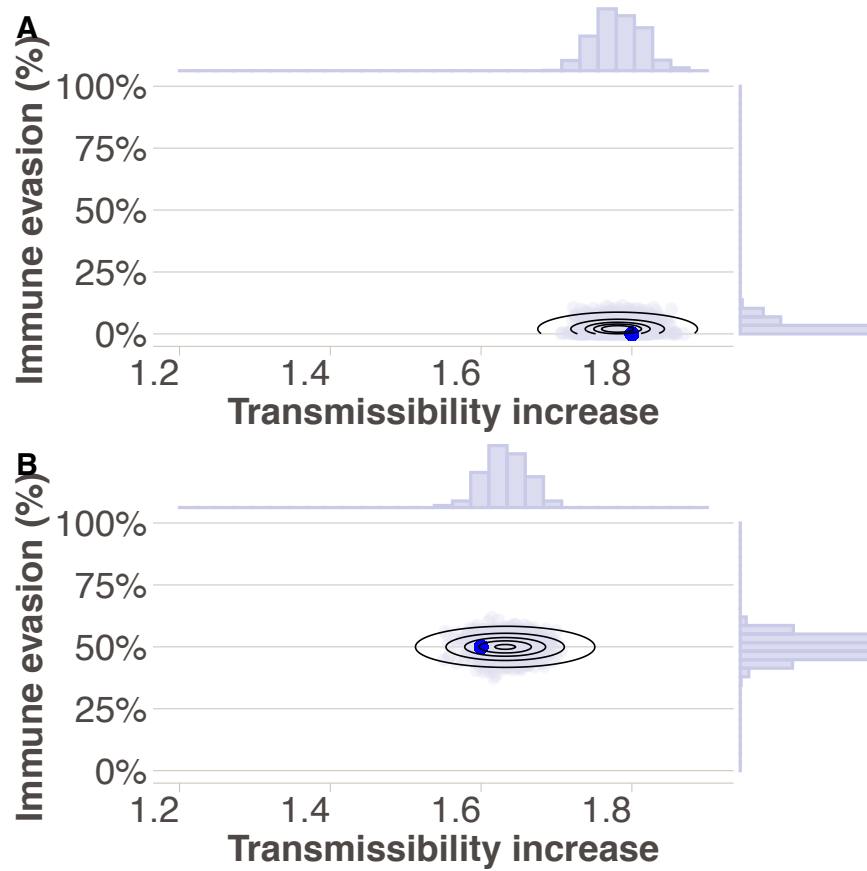

Figure 1: Estimated values for epidemiological characteristics from simulated data settings. Ground truth is indicated by black circles for (A) no immune evasion, increased transmissibility of  $1.8x$  and (B) 50% immune evasion, increased transmissibility of  $1.6x$ . In both (A) and (B), the ground truth blue circles, are well within the Bayesian 95% credible intervals (Black contours refer to posterior density intervals ranging from the 95% and 5% isoclines).

## References

- [1] Seth Flaxman, Swapnil Mishra, Axel Gandy, H Juliette T Unwin, Thomas A Mellan, Helen Coupland, Charles Whittaker, Harrison Zhu, Tresnia Berah, Jeffrey W Eaton, et al. “Estimating the effects of non-pharmaceutical interventions on COVID-19 in Europe”. In: *Nature* 584.7820 (2020), pp. 257–261. DOI: <https://doi.org/10.1038/s41586-020-2405-7>.
- [2] Nuno R Faria, Thomas A Mellan, Charles Whittaker, Ingra M Claro, Darlan da S Candido, Swapnil Mishra, Myuki A E Crispim, Flavia C S Sales, Iwona Hawryluk, John T McCrone, Ruben J G Hulswit, Lucas A M Franco, Mariana S Ramundo, Jaqueline G de Jesus, Pamela S Andrade, Thais M Coletti, Giulia M Ferreira, Camila A M Silva, Erika R Manuli, Rafael H M Pereira, Pedro S Peixoto, Moritz U G Kraemer, Nelson Gaburo Jr, Cecilia da C Camilo, Henrique Hoeltgebaum, William M Souza, Esmeria C Rocha, Leandro M de Souza, Mariana C de Pinho, Leonardo J T Araujo, Frederico S V Malta, Aline B de Lima, Joice do P Silva, Danielle A G Zauli, Alessandro C de S Ferreira, Ricardo P Schnekenberg, Daniel J Laydon, Patrick G T Walker, Hannah M Schlüter, Ana L P Dos Santos, Maria S Vidal, Valentina S Del Caro, Rosinaldo M F Filho, Helem M Dos Santos, Renato S Aguiar, José L Proença-Modena, Bruce Nelson, James A Hay, Mélodie Monod, Xenia Miscouridou, Helen Coupland, Raphael Sonabend, Michaela Vollmer, Axel Gandy, Carlos A Prete Jr, Vitor H Nascimento, Marc A Suchard, Thomas A Bowden, Sergei L K Pond, Chieh-Hsi Wu, Oliver Ratmann, Neil M Ferguson, Christopher Dye, Nick J Loman, Philippe Lemey, Andrew Rambaut, Nelson A Fraiji, Maria do P S S Carvalho, Oliver G Pybus, Seth Flaxman, Samir Bhatt, and Ester C Sabino. “Genomics and epidemiology of the P.1 SARS-CoV-2 lineage in Manaus, Brazil”. en. In: *Science* (Apr. 2021).
- [3] H Juliette T Unwin, Swapnil Mishra, Valerie C Bradley, Axel Gandy, Thomas A Mellan, Helen Coupland, Jonathan Ish-Horowicz, Michaela AC Vollmer, Charles Whittaker, Sarah L Filippi, et al. “State-level tracking of COVID-19 in the United States”. In: *Nature communications* 11.1 (2020), pp. 1–9.
- [4] Willy Feller. “On the Integral Equation of Renewal Theory”. In: *The Annals of Mathematical Statistics* (1941). ISSN: 0003-4851. DOI: [10.1214/aoms/1177731708](https://doi.org/10.1214/aoms/1177731708).
- [5] Nicholas Brazeau, Robert Verity, Sara Jenks, Han Fu, Charles Whittaker, Peter Winskill, Ilaria Dorigatti, Patrick Walker, Steven Riley, Ricardo P Schnekenberg, et al. “Report 34: COVID-19 infection fatality ratio: estimates from seroprevalence”. In: (2020). URL: <https://www.imperial.ac.uk/mrc-global-infectious-disease-analysis/covid-19/report-34-ifr/>.
- [6] Joel Hellewell, Timothy William Russell, Rupert Beale, Gavin Kelly, Catherine Houlihan, Eleni Nastouli, Adam J Kucharski, SAFER Investigators, Field Study Team, Crick COVID-19 Consortium, et al. “Estimating the effectiveness of routine asymptomatic PCR testing at different frequencies for the detection of SARS-CoV-2 infections”. In: *medRxiv* (2020). DOI: <https://doi.org/10.1101/2020.11.24.20229948>.
- [7] Benny Borremans, Amandine Gamble, KC Prager, Sarah K Helman, Abby M McClain, Caitlin Cox, Van Savage, and James O Lloyd-Smith. “Quantifying antibody kinetics and RNA detection during early-phase SARS-CoV-2 infection by time since symptom onset”. In: *Elife* 9 (2020), e60122. DOI: [10.7554/eLife.60122](https://doi.org/10.7554/eLife.60122).
- [8] James A. Scott, Axel Gandy, Swapnil Mishra, Juliette Unwin, Seth Flaxman, and Samir Bhatt. *epidemia: Modeling of Epidemics using Hierarchical Bayesian Models*. R package version 0.5.3. 2020. URL: <https://imperialcollegelondon.github.io/epidemia/>.
- [9] Samir Bhatt, Neil Ferguson, Seth Flaxman, Axel Gandy, Swapnil Mishra, and James A. Scott. “Semi-Mechanistic Bayesian Modeling of COVID-19 with Renewal Processes”. In: *arXiv* (2020). eprint: [2012.00394](https://arxiv.org/abs/2012.00394).
- [10] Andrew Gelman Matthew D. Hoffman Daniel Lee Ben Goodrich Michael Betancourt Marcus Brubaker Jiqiang Guo Peter Li Carpenter Bob and Allen Riddell. “Stan: A probabilistic programming language.” In: *Journal of statistical software* (2017).
